# Supplementary material for: Smaller Body Size, Early Postnatal Lethality, and Cortical Extracellular Matrix-Related Gene Expression Changes of Cyfip2-Null Embryonic Mice
Source: Front Mol Neurosci. 2019 Jan 4;11:482. doi: 10.3389/fnmol.2018.00482 (PMC6338024; doi:10.3389/fnmol.2018.00482)
Supplement: Supplementary file 2 [file Data_Sheet_2.xlsx]

## Sheet: Table S1
Supplementary Table 1. Summary of RNA-Seq mapping results.
The raw reads were mapped to the Mus musculus genome (GRCm38) using HISAT2
Sample ID	Genotype	Raw Reads	QC-passed Reads	Mapped Reads	Mapping Rate %
E-WT1	WT	77398210	75419788	1978422	97.44
E-WT2	WT	137189646	133295438	3894208	97.16
E-WT3	WT	96249002	93752694	2496308	97.41
E-HET1	HET	90382546	87517932	2864614	96.83
E-HET2	HET	102703458	100088068	2615390	97.45
E-HET3	HET	88049718	85604425	2445293	97.22
E-KO1	KO	74409270	71984873	2424397	96.74
E-KO2	KO	82893884	80460470	2433414	97.06
E-KO3	KO	102637746	99885361	2752385	97.32

## Sheet: Table S2
Supplementary Table 2. List of DEG (Differentially Expressed Gene) from RNA-Seq analysis results (Cyfip2+/-).
Differential expression analysis was carried out using DESeq2.
Gene information			RNA-seq probe information		DESeq2 results						Functional annotation
HGNC symbol	Full name	Position (human)	Ensembl ID (mouse)	Position (mouse)	baseMean	log2FC	FC	p-value	adjusted p-value	direction	GO terms	KEGG Pathway
HBA2	hemoglobin subunit alpha 2	Chr16:172847-173710	ENSMUSG00000069919	Chr11:32283511-32284465	14302.3	0.631026	1.54867	7.54952e-15	6.91007e-11	up	haptoglobin binding;endocytic vesicle lumen;haptoglobin-hemoglobin complex;positive regulation of cell death;response to hydrogen peroxide;bicarbonate transport;oxygen transport;hemoglobin complex;oxygen transporter activity;small molecule metabolic process;hydrogen peroxide catabolic process;protein heterooligomerization;extracellular exosome;blood microparticle;oxygen binding;cytosolic small ri…	African trypanosomiasis;Malaria;
SST	somatostatin	Chr3:187668906-187670399	ENSMUSG00000004366	Chr16:23889573-23890958	740.005	-0.787361	-1.72591	4.37428e-14	2.66918e-10	down	hormone-mediated apoptotic signaling pathway;response to nutrient;cell-cell signaling;synaptic transmission;digestion;cell surface receptor signaling pathway;negative regulation of cell proliferation;regulation of cell migration;hormone activity;extracellular region;G-protein coupled receptor signaling pathway;extracellular space;response to heat;response to drug;response to organonitrogen compou…	Gastric acid secretion;
MRPS23	mitochondrial ribosomal protein S23	Chr17:57834781-57850056	ENSMUSG00000023723	Chr11:88204388-88211507	1240.55	-0.407699	-1.32657	6.66134e-14	3.04856e-10	down	mitochondrial translational termination;mitochondrial translational elongation;mitochondrial translational initiation;mitochondrial translation;intermediate filament cytoskeleton;organelle organization;poly(A) RNA binding;protein binding;mitochondrial inner membrane;mitochondrion;ribosome;nuclear membrane;translation;structural constituent of ribosome;
SCUBE1	signal peptide, CUB domain and EGF like domain containing 1	Chr22:43197283-43343388	ENSMUSG00000016763	Chr15:83604999-83725021	7797	0.264874	1.20153	2.45859e-11	9.00139e-08	up	extrinsic component of plasma membrane;post-embryonic development;adult heart development;endothelial cell differentiation;blood coagulation;cell surface;external side of plasma membrane;identical protein binding;protein binding;protein heterodimerization activity;inflammatory response;protein homooligomerization;extracellular space;calcium ion binding;
CIZ1	CDKN1A interacting zinc finger protein 1	Chr9:128166064-128204383	ENSMUSG00000039205	Chr2:32352327-32380970	4533.81	0.236313	1.17798	8.71128e-10	2.65781e-06	up	protein binding;metal ion binding;nucleic acid binding;zinc ion binding;nucleus;cyclin binding;positive regulation of DNA-dependent DNA replication initiation;maintenance of protein location in nucleus;
NEGR1	neuronal growth regulator 1	Chr1:71395940-72282734	ENSMUSG00000040037	Chr3:156561794-157316445	2770.75	-0.373949	-1.2959	2.52169e-09	5.77026e-06	down	extracellular exosome;protein binding;anchored component of membrane;plasma membrane;single organismal cell-cell adhesion;feeding behavior;locomotory behavior;positive regulation of neuron projection development;	Cell adhesion molecules (CAMs);
DDN	dendrin	Chr12:48995149-48999309	ENSMUSG00000059213	Chr15:98803777-98809490	216.815	-1.02848	-2.03988	7.5748e-08	0.000126058	down	dendritic spine membrane;cell projection;perikaryon;protein binding;transcription factor activity, RNA polymerase II core promoter proximal region sequence-specific binding;RNA polymerase II core promoter proximal region sequence-specific DNA binding;endoplasmic reticulum membrane;positive regulation of transcription from RNA polymerase II promoter;cytoplasm;nucleus;plasma membrane;
KMT2E	lysine methyltransferase 2E	Chr7:105014179-105114361	ENSMUSG00000029004	Chr5:23434441-23504235	11570.9	0.158809	1.11636	1.31053e-07	0.000199922	up	neutrophil mediated immunity;erythrocyte differentiation;MLL5-L complex;histone H3-K4 methylation;histone methyltransferase activity (H3-K4 specific);cellular response to retinoic acid;positive regulation of granulocyte differentiation;neutrophil activation;intercellular bridge;enzyme binding;retinoic acid receptor signaling pathway;nuclear speck;chromatin organization;DNA methylation;protein bin…	Lysine degradation;
THSD7A	thrombospondin type 1 domain containing 7A	Chr7:11370357-11832198	ENSMUSG00000032625	Chr6:12311610-12749410	849.446	-0.629549	-1.54708	2.00978e-07	0.000283007	down	extracellular exosome;cell differentiation;plasma membrane;angiogenesis;integral component of membrane;
BTBD3	BTB domain containing 3	Chr20:11890723-11926609	ENSMUSG00000062098	Chr2:138256565-138589292	1795.01	-0.277944	-1.21247	3.78355e-07	0.000494726	down	dendrite morphogenesis;cerebral cortex development;protein binding;cytosol;nucleus;
TFAM	transcription factor A, mitochondrial	Chr10:58385022-58399221	ENSMUSG00000003923	Chr10:71225464-71238280	1437.23	-0.51157	-1.4256	4.12258e-07	0.00050312	down	mitochondrial light strand promoter sense binding;regulation of transcription from RNA polymerase I promoter;transcriptional activator activity, RNA polymerase II core promoter proximal region sequence-specific binding;mitochondrial nucleoid;transcription initiation from mitochondrial promoter;transcription from mitochondrial promoter;DNA binding, bending;mitochondrion organization;gene expressio…	Huntington's disease;
RINT1	RAD50 interactor 1	Chr7:105532085-105567677	ENSMUSG00000028999	Chr5:23787711-23820369	793.712	0.495253	1.40957	6.92645e-07	0.000746977	up	regulation of signal transduction involved in mitotic G2 DNA damage checkpoint;regulation of ER to Golgi vesicle-mediated transport;Dsl1p complex;protein binding;Golgi vesicle transport;endoplasmic reticulum;endoplasmic reticulum membrane;cell cycle;protein transport;
ARHGEF2	Rho/Rac guanine nucleotide exchange factor 2	Chr1:155946851-156007070	ENSMUSG00000028059	Chr3:88605966-88648052	7725.8	0.190348	1.14104	6.93686e-07	0.000746977	up	negative regulation of necroptotic process;negative regulation of intrinsic apoptotic signaling pathway in response to osmotic stress;cellular hyperosmotic response;Rac guanyl-nucleotide exchange factor activity;ruffle membrane;cellular response to muramyl dipeptide;Rac GTPase binding;negative regulation of extrinsic apoptotic signaling pathway via death domain receptors;positive regulation of tu…	Pathogenic Escherichia coli infection;
PCGF2	polycomb group ring finger 2	Chr17:38733897-38749817	ENSMUSG00000018537	Chr11:97688823-97700497	5254.78	0.172062	1.12667	7.43555e-07	0.000756196	up	nuclear chromatin;post-translational protein modification;PRC1 complex;PcG protein complex;protein sumoylation;cellular protein metabolic process;protein binding;negative regulation of transcription from RNA polymerase II promoter;transcription factor activity, sequence-specific DNA binding;transcription, DNA-templated;metal ion binding;nucleoplasm;zinc ion binding;DNA binding;nucleus;nuclear chr…	Signaling pathways regulating pluripotency of stem cells;
DIO3	iodothyronine deiodinase 3	Chr14:101561351-101563452	ENSMUSG00000075707	Chr12:110279068-110281097	16.4753	-4.34234	-20.285	1.16336e-06	0.00109677	down	cellular nitrogen compound metabolic process;endosome membrane;small molecule metabolic process;biological_process;thyroid hormone generation;hormone biosynthetic process;thyroxine 5'-deiodinase activity;oxidation-reduction process;plasma membrane;integral component of membrane;positive regulation of multicellular organism growth;thyroxine 5-deiodinase activity;thyroid hormone catabolic process;	Thyroid hormone signaling pathway;
IGF2BP1	insulin like growth factor 2 mRNA binding protein 1	Chr17:48997412-49055650	ENSMUSG00000013415	Chr11:95957163-96005940	1696.7	0.230346	1.17312	1.31663e-06	0.0011355	up	regulation of mRNA stability involved in response to stress;CRD-mediated mRNA stability complex;CRD-mediated mRNA stabilization;cytoplasmic stress granule;mRNA 5'-UTR binding;translation regulator activity;mRNA 3'-UTR binding;regulation of cytokine biosynthetic process;dendritic spine;gene expression;growth cone;axon;filopodium;lamellipodium;mRNA transport;poly(A) RNA binding;protein binding;nega…	MicroRNAs in cancer;
RNF123	ring finger protein 123	Chr3:49689499-49721529	ENSMUSG00000041528	Chr9:108051534-108083346	3038.13	0.236043	1.17776	1.36463e-06	0.0011355	up	protein binding;ligase activity;protein ubiquitination;zinc ion binding;cytoplasm;
UAP1L1	UDP-N-acetylglucosamine pyrophosphorylase 1 like 1	Chr9:137077501-137084539	ENSMUSG00000026956	Chr2:25359889-25365682	111.055	-1.09	-2.12874	1.70955e-06	0.00136065	down	UDP-N-acetylglucosamine diphosphorylase activity;UDP-N-acetylglucosamine biosynthetic process;uridylyltransferase activity;cytosol;metabolic process;	Amino sugar and nucleotide sugar metabolism;Metabolic pathways;
VCAN	versican	Chr5:83471465-83582303	ENSMUSG00000021614	Chr13:89655312-89742509	13822.3	0.209131	1.15599	2.04517e-06	0.00155995	up	glial cell migration;glycosaminoglycan binding;osteoblast differentiation;cell recognition;dermatan sulfate biosynthetic process;chondroitin sulfate catabolic process;chondroitin sulfate biosynthetic process;lysosomal lumen;chondroitin sulfate metabolic process;Golgi lumen;central nervous system development;glycosaminoglycan metabolic process;extracellular matrix organization;skeletal system deve…	Cell adhesion molecules (CAMs);
FAM205A	family with sequence similarity 205 member A	Chr9:34723055-34729467	ENSMUSG00000079774	ChrGL456350.1:144079-149877	397.165	-0.550194	-1.46428	2.27845e-06	0.00163671	down	integral component of membrane;nucleus;
CELSR3	cadherin EGF LAG seven-pass G-type receptor 3	Chr3:48636469-48662915	ENSMUSG00000023473	Chr9:108826320-108852969	20995.4	0.212545	1.15873	2.33204e-06	0.00163671	up	protein binding;cell surface receptor signaling pathway;transmembrane signaling receptor activity;G-protein coupled receptor activity;cell adhesion;homophilic cell adhesion via plasma membrane adhesion molecules;membrane;plasma membrane;G-protein coupled receptor signaling pathway;integral component of membrane;calcium ion binding;axonal fasciculation;cilium assembly;regulation of protein localiz…
ANKHD1-EIF4EBP3	ANKHD1-EIF4EBP3 readthrough	Chr5:140401908-140549569	ENSMUSG00000024483	Chr18:36559987-36665917	5320.84	0.24264	1.18316	2.41403e-06	0.00163671	up	protein binding;RNA binding;nucleic acid binding;
SEMA3F	semaphorin 3F	Chr3:50155045-50189075	ENSMUSG00000034684	Chr9:107681500-107710475	3516.05	0.222797	1.16699	2.65184e-06	0.00173374	up	protein binding;negative regulation of axon extension involved in axon guidance;chemorepellent activity;neuropilin binding;semaphorin receptor binding;neural crest cell migration;semaphorin-plexin signaling pathway involved in neuron projection guidance;sympathetic neuron projection guidance;sympathetic neuron projection extension;sympathetic ganglion development;axon extension involved in axon g…	Axon guidance;
C1orf112	chromosome 1 open reading frame 112	Chr1:169662007-169854080	ENSMUSG00000041406	Chr1:163945993-163994796	366.407	0.486945	1.40147	3.16146e-06	0.00199565	up
MYCBP	MYC binding protein	Chr1:38862964-38874105	ENSMUSG00000028647	Chr4:123904832-123912269	183.117	-0.820589	-1.76613	3.56325e-06	0.00217429	down	protein binding;spermatogenesis;transcription coactivator activity;mitochondrion;regulation of transcription, DNA-templated;transcription, DNA-templated;cytoplasm;nucleus;
TTC28	tetratricopeptide repeat domain 28	Chr22:27978014-28679865	ENSMUSG00000033209	Chr5:110879803-111289780	31310.5	0.22456	1.16842	3.71013e-06	0.00219089	up	cell division;protein binding;mitotic nuclear division;midbody;regulation of mitotic cell cycle;spindle pole;centrosome;cytoplasm;
NRGN	neurogranin	Chr11:124739846-124747210	ENSMUSG00000053310	Chr9:37544492-37552904	610.185	-0.63922	-1.55749	4.372e-06	0.00250105	down	protein binding;calmodulin binding;signal transduction;nervous system development;nucleus;cytoplasm;synapse;dendrite;axon;neuronal cell body;mitochondrial membrane;postsynaptic density;positive regulation of long-term synaptic potentiation;associative learning;phosphatidylinositol-3,4,5-trisphosphate binding;phosphatidic acid binding;dendritic spine head;telencephalon development;trans-Golgi netw…
HIPK2	homeodomain interacting protein kinase 2	Chr7:139561570-139777778	ENSMUSG00000061436	Chr6:38694390-38876165	3838.37	0.202582	1.15076	4.62609e-06	0.00256622	up	PML body organization;virion binding;erythrocyte differentiation;nuclear body;RNA polymerase II transcription coactivator activity;intrinsic apoptotic signaling pathway in response to DNA damage by p53 class mediator;DNA damage response, signal transduction by p53 class mediator resulting in transcription of p21 class mediator;peptidyl-threonine phosphorylation;cellular response to hypoxia;RNA po…
SH3YL1	SH3 and SYLF domain containing 1	Chr2:217730-266398	ENSMUSG00000020669	Chr12:30911668-30960162	813.679	-0.288399	-1.22128	6.02984e-06	0.00319988	down	regulation of ruffle assembly;ruffle membrane;phosphatase binding;protein binding;phosphatidylinositol binding;phosphatidylinositol biosynthetic process;
RBM38	RNA binding motif protein 38	Chr20:57391407-57409333	ENSMUSG00000027510	Chr2:173020498-173034734	652.662	0.369021	1.29148	6.11799e-06	0.00319988	up	3'-UTR-mediated mRNA stabilization;DNA damage response, signal transduction by p53 class mediator resulting in transcription of p21 class mediator;mRNA 3'-UTR binding;DNA damage response, signal transduction by p53 class mediator resulting in cell cycle arrest;poly(A) RNA binding;mRNA binding;regulation of RNA splicing;RNA splicing;negative regulation of cell proliferation;cell differentiation;cy…
MRPL19	mitochondrial ribosomal protein L19	Chr2:75646783-75690851	ENSMUSG00000030045	Chr6:81957851-81965958	1079.7	-0.495665	-1.40997	7.67018e-06	0.00390029	down	mitochondrial large ribosomal subunit;mitochondrial translational termination;mitochondrial translational elongation;mitochondrial translational initiation;mitochondrial translation;organelle organization;mitochondrial inner membrane;intracellular;ribosome;nuclear membrane;translation;structural constituent of ribosome;nucleus;mitochondrion;	Ribosome;
LENG8	leukocyte receptor cluster member 8	Chr19:54448887-54462037	ENSMUSG00000035545	Chr7:4137039-4148177	19399.3	0.232339	1.17474	8.3771e-06	0.00410759	up	protein binding;protein binding;protein binding;protein binding;
EID1	EP300 interacting inhibitor of differentiation 1	Chr15:48877886-48880183	ENSMUSG00000091337	Chr2:125673095-125674785	8971.39	-0.159038	-1.11654	9.39415e-06	0.00438825	down	histone acetyltransferase regulator activity;regulation of histone acetylation;histone acetyltransferase binding;aggresome;protein binding;cell differentiation;negative regulation of transcription, DNA-templated;negative regulation of transcription from RNA polymerase II promoter;transcription corepressor activity;cell cycle;transcription, DNA-templated;nucleoplasm;cytoplasm;nucleus;
SYNJ2	synaptojanin 2	Chr6:157981887-158099176	ENSMUSG00000023805	Chr17:5941280-6044290	104.276	-0.826744	-1.77368	1.01442e-05	0.00438825	down	phosphatidylinositol-4,5-bisphosphate 5-phosphatase activity;phosphatidylinositol biosynthetic process;small molecule metabolic process;phosphoric ester hydrolase activity;protein binding;phospholipid metabolic process;phosphatidylinositol dephosphorylation;cytosol;membrane;RNA binding;nucleic acid binding;nucleotide binding;metabolic process;hydrolase activity;	Inositol phosphate metabolism;Metabolic pathways;Phosphatidylinositol signaling system;
NEURL1	neuralized E3 ubiquitin protein ligase 1	Chr10:103493979-103592552	ENSMUSG00000006435	Chr19:47178820-47259440	442.889	-0.43698	-1.35377	1.03018e-05	0.00438825	down	apical dendrite;positive regulation of long-term neuronal synaptic plasticity;negative regulation of Notch signaling pathway;translation factor activity, non-nucleic acid binding;protein monoubiquitination;cellular response to amino acid stimulus;positive regulation of filopodium assembly;positive regulation of dendritic spine development;dendritic spine;postsynaptic density;regulation of transla…
SYNE2	spectrin repeat containing nuclear envelope protein 2	Chr14:63852983-64226433	ENSMUSG00000063450	Chr12:75818134-76110926	10649	0.239721	1.18076	1.08201e-05	0.00450164	up	nuclear migration along microfilament;centrosome localization;nuclear lumen;nuclear migration;nuclear outer membrane;lamellipodium membrane;filopodium membrane;Z disc;nuclear envelope;aggresome;intermediate filament cytoskeleton;sarcoplasmic reticulum;extracellular exosome;positive regulation of cell migration;sarcoplasmic reticulum membrane;protein binding;focal adhesion;cytoskeletal anchoring a…
SLC1A2	solute carrier family 1 member 2	Chr11:35251206-35420063	ENSMUSG00000005089	Chr2:102658659-102790784	2940.62	-0.413486	-1.3319	1.18598e-05	0.00482456	down	D-aspartate import;L-glutamate import;L-glutamate transmembrane transport;glutamate secretion;L-glutamate transmembrane transporter activity;cell surface;protein binding;ion transport;synaptic transmission;neurotransmitter secretion;sodium:dicarboxylate symporter activity;dicarboxylic acid transport;membrane;transmembrane transport;plasma membrane;integral component of membrane;nervous system dev…	Glutamatergic synapse;Amyotrophic lateral sclerosis (ALS);
ARHGEF1	Rho guanine nucleotide exchange factor 1	Chr19:41883161-41930150	ENSMUSG00000040940	Chr7:24902912-24926594	7698.72	0.194764	1.14454	1.34901e-05	0.00525424	up	negative regulation of axonogenesis;regulation of axonogenesis;neurotrophin TRK receptor signaling pathway;cell proliferation;poly(A) RNA binding;protein binding;Rho protein signal transduction;cytosol;regulation of Rho protein signal transduction;Rho guanyl-nucleotide exchange factor activity;positive regulation of GTPase activity;GTPase activator activity;plasma membrane;cytoplasm;	Vascular smooth muscle contraction;Platelet activation;Regulation of actin cytoskeleton;Pathways in cancer;Proteoglycans in cancer;
GGA3	golgi associated, gamma adaptin ear containing, ARF binding protein 3	Chr17:75236599-75262363	ENSMUSG00000020740	Chr11:115584255-115604051	3778.54	0.384265	1.30519	1.40732e-05	0.00536717	up	endosome membrane;cellular protein metabolic process;protein binding;ADP-ribosylation factor binding;trans-Golgi network;clathrin adaptor complex;vesicle-mediated transport;intracellular protein transport;intracellular;positive regulation of protein catabolic process;	Lysosome;
KMT2A	lysine methyltransferase 2A	Chr11:118436490-118526832	ENSMUSG00000002028	Chr9:44803355-44881296	14229.9	0.230192	1.17299	1.91956e-05	0.00717132	up	positive regulation of cellular response to drug;regulation of histone H3-K14 acetylation;unmethylated CpG binding;AT DNA binding;embryonic hemopoiesis;histone H3-K4 trimethylation;positive regulation of histone H3-K4 methylation;lysine-acetylated histone binding;regulation of histone H3-K9 acetylation;histone H3-K4 methylation;histone methyltransferase activity (H3-K4 specific);MLL1 complex;hist…	Lysine degradation;Transcriptional misregulation in cancer;
SLC24A4	solute carrier family 24 member 4	Chr14:92322581-92501483	ENSMUSG00000041771	Chr12:102128733-102267091	100.328	-0.71005	-1.63586	2.03171e-05	0.00720508	down	amelogenesis;sodium ion binding;calcium, potassium:sodium antiporter activity;potassium ion binding;response to stimulus;sensory perception of smell;symporter activity;ion transport;potassium ion transport;cellular calcium ion homeostasis;integral component of plasma membrane;calcium channel activity;calcium ion transmembrane transport;sodium ion transmembrane transport;membrane;transmembrane tra…	Olfactory transduction;
R3HDM2	R3H domain containing 2	Chr12:57253762-57431005	ENSMUSG00000025404	Chr10:127380327-127499384	7197.99	0.154364	1.11293	2.038e-05	0.00720508	up	poly(A) RNA binding;protein binding;nucleic acid binding;nucleus;
TMEM131L	transmembrane 131 like	null	ENSMUSG00000033767	Chr3:83897655-84040175	9060.31	0.166269	1.12215	2.04667e-05	0.00720508	up
UNK	unkempt family zinc finger	Chr17:75784771-75825799	ENSMUSG00000020770	Chr11:116030322-116061214	2500.26	0.18671	1.13816	2.37583e-05	0.00820603	up	mRNA CDS binding;cell morphogenesis involved in neuron differentiation;polysome;negative regulation of cytoplasmic translation;poly(A) RNA binding;metal ion binding;zinc ion binding;cytoplasm;neuron migration;
RPRML	reprimo like	Chr17:46978156-46979248	ENSMUSG00000046215	Chr11:103649570-103650579	95.9713	-1.01198	-2.01667	2.50348e-05	0.00840061	down	integral component of membrane;
SMG7	SMG7, nonsense mediated mRNA decay factor	Chr1:183472216-183598246	ENSMUSG00000042772	Chr1:152836995-152902646	4303.34	0.15585	1.11408	2.52394e-05	0.00840061	up	protein binding;intermediate filament cytoskeleton;cytoplasm;regulation of dephosphorylation;protein phosphatase 2A binding;mRNA export from nucleus;gene expression;nuclear-transcribed mRNA catabolic process, nonsense-mediated decay;cytosol;nucleus;	mRNA surveillance pathway;
DVL3	dishevelled segment polarity protein 3	Chr3:184155388-184173610	ENSMUSG00000003233	Chr16:20516982-20534010	4065.9	0.144065	1.10501	2.57601e-05	0.00842081	up	non-canonical Wnt signaling pathway via JNK cascade;positive regulation of JUN kinase activity;regulation of cellular protein localization;planar cell polarity pathway involved in neural tube closure;Wnt signaling pathway, planar cell polarity pathway;frizzled binding;protease binding;non-canonical Wnt signaling pathway;protein stabilization;positive regulation of canonical Wnt signaling pathway;…	Wnt signaling pathway;Notch signaling pathway;Hippo signaling pathway;Signaling pathways regulating pluripotency of stem cells;Melanogenesis;HTLV-I infection;Pathways in cancer;Basal cell carcinoma;
HACL1	2-hydroxyacyl-CoA lyase 1	Chr3:15560704-15601852	ENSMUSG00000021884	Chr14:31598730-31641286	134.146	-0.614529	-1.53106	3.07732e-05	0.00967829	down	carbon-carbon lyase activity;cofactor binding;fatty acid alpha-oxidation;protein oligomerization;peroxisomal matrix;small molecule metabolic process;cellular lipid metabolic process;identical protein binding;thiamine pyrophosphate binding;peroxisome;protein binding;receptor binding;catalytic activity;magnesium ion binding;lipid metabolic process;lyase activity;metabolic process;	Peroxisome;
HJURP	Holliday junction recognition protein	Chr2:233833416-233854566	ENSMUSG00000044783	Chr1:88262471-88277633	8864.85	0.221192	1.1657	3.13335e-05	0.00967829	up	regulation of DNA binding;regulation of protein complex assembly;chromosome segregation;identical protein binding;protein binding;nucleosome assembly;condensed chromosome kinetochore;histone binding;CENP-A containing nucleosome assembly;chromosome, centromeric region;cell cycle;nucleolus;nucleoplasm;DNA binding;cytoplasm;nucleus;
VPS25	vacuolar protein sorting 25 homolog	Chr17:42773436-42779599	ENSMUSG00000078656	Chr11:101253707-101259549	1340.55	-0.247234	-1.18693	3.17217e-05	0.00967829	down	protein targeting to vacuole involved in ubiquitin-dependent protein catabolic process via the multivesicular body sorting pathway;ESCRT II complex;protein N-terminus binding;membrane organization;endosome membrane;protein homodimerization activity;extracellular exosome;protein binding;structural molecule activity;cytosol;endosomal transport;regulation of transcription, DNA-templated;transcriptio…	Endocytosis;
SYT17	synaptotagmin 17	Chr16:19167971-19268334	ENSMUSG00000058420	Chr7:118380717-118448222	60.5137	-1.05837	-2.08257	3.86606e-05	0.011602	down	exocytosis;cell;exocytic vesicle;positive regulation of dendrite extension;syntaxin binding;protein binding;clathrin binding;calcium-dependent phospholipid binding;membrane;calcium ion binding;trans-Golgi network;
MARS	methionyl-tRNA synthetase	Chr12:57475445-57517569	ENSMUSG00000040354	Chr10:127296221-127311786	3731.21	0.24514	1.18521	4.18543e-05	0.0123578	up	methionyl-tRNA aminoacylation;methionine-tRNA ligase activity;gene expression;tRNA binding;extracellular exosome;tRNA aminoacylation for protein translation;aminoacyl-tRNA ligase activity;cytosol;membrane;nucleotide binding;cytoplasm;ATP binding;	Selenocompound metabolism;Aminoacyl-tRNA biosynthesis;
DYRK1B	dual specificity tyrosine phosphorylation regulated kinase 1B	ChrCHR_HG2021_PATCH:39825350-39834201	ENSMUSG00000002409	Chr7:28179469-28187294	1409.5	0.20232	1.15055	4.73789e-05	0.0136093	up	protein serine/threonine/tyrosine kinase activity;adipose tissue development;protein binding;positive regulation of transcription, DNA-templated;transcription coactivator activity;protein serine/threonine kinase activity;peptidyl-tyrosine phosphorylation;protein tyrosine kinase activity;protein phosphorylation;nucleus;ATP binding;protein kinase activity;myoblast fusion;protein serine/threonine/ty…
CRAMP1	cramped chromatin regulator homolog 1	Chr16:1612325-1677908	ENSMUSG00000038002	Chr17:24961228-25015230	3258.03	0.14475	1.10554	4.75799e-05	0.0136093	up	DNA binding;nucleus;
NIN	ninein	Chr14:50719763-50831121	ENSMUSG00000021068	Chr12:70011435-70113717	6756.53	0.163038	1.11964	5.07319e-05	0.0140779	up	microtubule anchoring at centrosome;centrosome;calcium ion binding;centrosome localization;pericentriolar material;protein binding;spindle pole;microtubule;GTP binding;nucleolus;
MRPS11	mitochondrial ribosomal protein S11	Chr15:88467453-88480773	ENSMUSG00000030611	Chr7:78783119-78792989	653.843	-0.276758	-1.21147	5.07562e-05	0.0140779	down	ribosome;translation;structural constituent of ribosome;small ribosomal subunit rRNA binding;DNA damage response, detection of DNA damage;mitochondrial translational termination;mitochondrial translational elongation;mitochondrial translational initiation;mitochondrial translation;mitochondrial small ribosomal subunit;maturation of SSU-rRNA from tricistronic rRNA transcript (SSU-rRNA, 5.8S rRNA, …	Ribosome;
ADAMTS10	ADAM metallopeptidase with thrombospondin type 1 motif 10	Chr19:8580242-8610735	ENSMUSG00000024299	Chr17:33524204-33553782	4090.98	0.178634	1.13181	5.40747e-05	0.0147745	up	microfibril;biological_process;molecular_function;protein binding;peptidase activity;extracellular matrix;metalloendopeptidase activity;proteolysis;zinc ion binding;proteinaceous extracellular matrix;
LMTK3	lemur tyrosine kinase 3	Chr19:48485271-48513189	ENSMUSG00000062044	Chr7:45783738-45804144	13734	0.1828	1.13508	5.88147e-05	0.0156038	up	dendrite;negative regulation of phosphatase activity;axon;cellular_component;molecular_function;Golgi membrane;protein serine/threonine kinase activity;metal ion binding;integral component of membrane;protein phosphorylation;ATP binding;protein kinase activity;
TMEM254	transmembrane protein 254	Chr10:80078646-80092557	ENSMUSG00000072676	Chr14:25923300-25927672	779.733	-0.296272	-1.22797	6.05054e-05	0.0156336	down	integral component of membrane;
MIDN	midnolin	Chr19:1248553-1259140	ENSMUSG00000035621	Chr10:80148272-80158368	10799.6	0.129803	1.09414	6.06352e-05	0.0156336	up	protein binding;nucleolus;nucleus;cytosol;kinase binding;negative regulation of insulin secretion;negative regulation of glucokinase activity;
DLGAP2	DLG associated protein 2	ChrCHR_HSCHR8_5_CTG1:1501879-1707457	ENSMUSG00000047495	Chr8:14095865-14847680	579.993	-0.379042	-1.30048	6.92884e-05	0.0171404	down	neuron-neuron synaptic transmission;postsynaptic density;neuron-neuron synaptic transmission;protein binding;signaling;postsynaptic membrane;cell junction;neurofilament;neuron-neuron synaptic transmission;signaling;neuron-neuron synaptic transmission;signaling;
CIC	capicua transcriptional repressor	Chr19:42268537-42295797	ENSMUSG00000005442	Chr7:25267704-25294159	15814.8	0.215579	1.16117	7.51928e-05	0.0178774	up	protein binding;negative regulation of transcription from RNA polymerase II promoter;transcription, DNA-templated;DNA binding;nucleus;chromatin binding;lung alveolus development;
RASA1	RAS p21 protein activator 1	Chr5:87267888-87391931	ENSMUSG00000021549	Chr13:85214780-85289130	4716.31	0.17475	1.12877	7.51974e-05	0.0178774	up	regulation of RNA metabolic process;GTPase binding;vasculogenesis;potassium channel inhibitor activity;blood vessel morphogenesis;negative regulation of neuron apoptotic process;negative regulation of cell-matrix adhesion;negative regulation of cell adhesion;glycoprotein binding;intrinsic component of the cytoplasmic side of the plasma membrane;regulation of actin filament polymerization;neurotro…	MAPK signaling pathway;Ras signaling pathway;Axon guidance;
SLC41A2	solute carrier family 41 member 2	Chr12:104802553-104958744	ENSMUSG00000034591	Chr10:83230848-83337882	307.722	-0.538669	-1.45263	7.92933e-05	0.0186095	down	cation transmembrane transporter activity;protein binding;cation transport;cation transmembrane transport;transmembrane transport;plasma membrane;integral component of membrane;
TENM3	teneurin transmembrane protein 3	Chr4:182143987-182803024	ENSMUSG00000031561	Chr8:48227682-48843951	9578.13	0.356531	1.28034	0.00010523	0.024384	up	signal transduction;integral component of membrane;camera-type eye morphogenesis;positive regulation of neuron projection development;protein homodimerization activity;axon;protein binding;self proteolysis;protein heterodimerization activity;homophilic cell adhesion via plasma membrane adhesion molecules;membrane;
PCDHGC4	protocadherin gamma subfamily C, 4	Chr5:141484997-141512979	ENSMUSG00000023036	Chr18:37815079-37841873	2875.03	-0.29522	-1.22707	0.000110221	0.0251878	down	cell adhesion;homophilic cell adhesion via plasma membrane adhesion molecules;membrane;plasma membrane;integral component of membrane;calcium ion binding;
POU6F1	POU class 6 homeobox 1	Chr12:51186936-51217693	ENSMUSG00000009739	Chr15:100575318-100599984	10054.2	0.14328	1.10441	0.000112802	0.0251878	up	muscle organ development;heart development;actin cytoskeleton;brain development;transcription factor activity, sequence-specific DNA binding;regulation of transcription, DNA-templated;transcription, DNA-templated;DNA binding;nucleus;RNA polymerase II regulatory region sequence-specific DNA binding;
SWT1	SWT1, RNA endoribonuclease homolog	Chr1:185157080-185291765	ENSMUSG00000052748	Chr1:151367699-151428455	564.027	-0.510958	-1.425	0.000112826	0.0251878	down
SYN2	synapsin II	Chr3:12004402-12191400	ENSMUSG00000009394	Chr6:115134902-115282006	1895.33	-0.409541	-1.32826	0.000121916	0.0268891	down	catalytic activity;metabolic process;ATP binding;neurotransmitter secretion;synapse;neuronal postsynaptic density;myelin sheath;synaptic vesicle membrane;synaptic vesicle;
SHKBP1	SH3KBP1 binding protein 1	Chr19:40576851-40591399	ENSMUSG00000089832	Chr7:27342133-27356019	2673.25	0.16394	1.12034	0.000124791	0.0271955	up	positive regulation of epidermal growth factor receptor signaling pathway;protein binding;protein homooligomerization;
IKBKB	inhibitor of nuclear factor kappa B kinase subunit beta	Chr8:42271302-42332653	ENSMUSG00000031537	Chr8:22659212-22706589	3771.42	0.187213	1.13856	0.000131771	0.0281979	up	negative regulation of bicellular tight junction assembly;regulation of establishment of endothelial barrier;nucleotide-binding oligomerization domain containing signaling pathway;serine phosphorylation of STAT protein;negative regulation of myosin-light-chain-phosphatase activity;regulation of tumor necrosis factor-mediated signaling pathway;IkappaB kinase complex;IkappaB kinase activity;nucleot…	MAPK signaling pathway;Ras signaling pathway;Chemokine signaling pathway;NF-kappa B signaling pathway;FoxO signaling pathway;mTOR signaling pathway;PI3K-Akt signaling pathway;Apoptosis;Osteoclast differentiation;Toll-like receptor signaling pathway;NOD-like receptor signaling pathway;RIG-I-like receptor signaling pathway;Cytosolic DNA-sensing pathway;T cell receptor signaling pathway;B cell recep…
E2F3	E2F transcription factor 3	Chr6:20401906-20493715	ENSMUSG00000016477	Chr13:29906575-29986063	1118.23	-0.336271	-1.26249	0.000132471	0.0281979	down	negative regulation of fat cell proliferation;mitotic cell cycle;core promoter binding;protein binding;transcription initiation from RNA polymerase II promoter;Notch signaling pathway;transcription factor complex;transcription factor activity, sequence-specific DNA binding;regulation of transcription, DNA-templated;nucleoplasm;cytoplasm;DNA binding;positive regulation of transcription, DNA-templa…	Cell cycle;Hepatitis B;HTLV-I infection;Pathways in cancer;MicroRNAs in cancer;Pancreatic cancer;Glioma;Prostate cancer;Melanoma;Bladder cancer;Chronic myeloid leukemia;Small cell lung cancer;Non-small cell lung cancer;
ZFX	zinc finger protein, X-linked	ChrX:24149173-24216255	ENSMUSG00000079509	ChrX:94074631-94123702	1737.98	0.220635	1.16525	0.000142304	0.0299427	up	regulation of transcription, DNA-templated;metal ion binding;DNA binding;nucleus;RNA polymerase II regulatory region sequence-specific DNA binding;transcription coactivator activity;multicellular organismal development;transcription factor activity, sequence-specific DNA binding;transcription, DNA-templated;
KCNMB2	potassium calcium-activated channel subfamily M regulatory beta subunit 2	Chr3:178272932-178844429	ENSMUSG00000037610	Chr3:31902507-32200180	171.428	0.63823	1.55642	0.000144845	0.0301311	up	potassium ion transport;calcium-activated potassium channel activity;potassium ion transmembrane transport;membrane;integral component of membrane;neuronal action potential;ion channel inhibitor activity;action potential;detection of calcium ion;blood coagulation;potassium channel regulator activity;regulation of vasoconstriction;synaptic transmission;integral component of plasma membrane;voltage…	cGMP-PKG signaling pathway;Vascular smooth muscle contraction;Insulin secretion;
ARID1A	AT-rich interaction domain 1A	Chr1:26696033-26782104	ENSMUSG00000007880	Chr4:133679008-133756769	14994.7	0.174464	1.12854	0.000151827	0.0312287	up	binding;nBAF complex;chromatin-mediated maintenance of transcription;nucleosome mobilization;ligand-dependent nuclear receptor binding;nucleosome disassembly;nuclear chromatin;intracellular estrogen receptor signaling pathway;glucocorticoid receptor signaling pathway;npBAF complex;protein binding;SWI/SNF complex;positive regulation of transcription, DNA-templated;transcription coactivator activit…
ATP8B2	ATPase phospholipid transporting 8B2	Chr1:154325553-154351307	ENSMUSG00000060671	Chr3:89939481-89963508	3388.37	0.159163	1.11664	0.000157143	0.031622	up	Golgi organization;Golgi apparatus;ion transmembrane transport;phospholipid translocation;phospholipid-translocating ATPase activity;magnesium ion binding;transmembrane transport;plasma membrane;metabolic process;metal ion binding;nucleotide binding;integral component of membrane;ATP binding;phospholipid transport;
NDFIP1	Nedd4 family interacting protein 1	Chr5:142108505-142154443	ENSMUSG00000024425	Chr18:38418975-38464399	3778.28	-0.225911	-1.16952	0.000157194	0.031622	down	negative regulation of protein transport;negative regulation of transporter activity;negative regulation of gene expression;positive regulation of protein ubiquitination;endosome membrane;protein binding;positive regulation of I-kappaB kinase/NF-kappaB signaling;cellular iron ion homeostasis;perinuclear region of cytoplasm;vacuolar transport;Golgi membrane;metal ion transport;signal transduction;…
STXBP6	syntaxin binding protein 6	Chr14:24809656-25050297	ENSMUSG00000046314	Chr12:44852484-45074709	477.492	-0.390295	-1.31066	0.000161922	0.0322189	down	regulation of SNARE complex assembly;negative regulation of exocytosis;Golgi to plasma membrane transport;exocyst localization;phosphatidylinositol-4,5-bisphosphate binding;GTP-Rho binding;exocyst;exocytosis;vesicle-mediated transport;plasma membrane;integral component of membrane;
GABARAPL1	GABA type A receptor associated protein like 1	Chr12:10212458-10223130	ENSMUSG00000030161	Chr6:129533160-129542346	5851.62	-0.165268	-1.12137	0.000165202	0.0323276	down	autophagy;macroautophagy;Tat protein binding;beta-tubulin binding;autophagosome;cellular response to nitrogen starvation;mitophagy;autophagosome assembly;autophagosome membrane;protein binding;GABA receptor binding;cytoplasmic vesicle membrane;endoplasmic reticulum;cytosol;Golgi apparatus;ubiquitin protein ligase binding;microtubule;intracellular;mitochondrion;cell body;dendrite membrane;dendrite…	FoxO signaling pathway;Regulation of autophagy;GABAergic synapse;
CACNA1H	calcium voltage-gated channel subunit alpha1 H	Chr16:1153241-1221771	ENSMUSG00000024112	Chr17:25374285-25433783	11022.4	0.232993	1.17527	0.000167021	0.0323276	up	positive regulation of acrosome reaction;cellular response to potassium ion;cortisol biosynthetic process;aldosterone biosynthetic process;scaffold protein binding;cellular response to hormone stimulus;membrane depolarization during action potential;regulation of heart contraction;regulation of membrane potential;muscle contraction;muscle organ development;calcium ion import;low voltage-gated cal…	MAPK signaling pathway;Calcium signaling pathway;Circadian entrainment;Aldosterone synthesis and secretion;
TRRAP	transformation/transcription domain associated protein	Chr7:98877933-99013243	ENSMUSG00000045482	Chr5:144767732-144859778	11932.9	0.1517	1.11088	0.000167766	0.0323276	up	binding;histone H2A acetylation;NuA4 histone acetyltransferase complex;PCAF complex;Swr1 complex;transcription factor TFTC complex;histone H4 acetylation;STAGA complex;transcription cofactor activity;histone deubiquitination;chromatin organization;protein binding;phosphotransferase activity, alcohol group as acceptor;DNA repair;Golgi apparatus;phosphorylation;kinase activity;transcription, DNA-te…	HTLV-I infection;
DACT1	dishevelled binding antagonist of beta catenin 1	Chr14:58633967-58648321	ENSMUSG00000044548	Chr12:71309884-71320107	2592.74	-0.177811	-1.13117	0.000172275	0.0328508	down	nucleoplasm;embryonic hindgut morphogenesis;regulation of Wnt signaling pathway, planar cell polarity pathway;positive regulation of cellular protein catabolic process;protein kinase C binding;positive regulation of catenin import into nucleus;protein kinase A binding;regulation of catenin import into nucleus;negative regulation of protein binding;positive regulation of Wnt signaling pathway;delt…
FNBP4	formin binding protein 4	Chr11:47716517-47767443	ENSMUSG00000008200	Chr2:90745370-90781021	5879.43	0.122096	1.08831	0.000178128	0.0336166	up	protein binding;nucleoplasm;
NPR2	natriuretic peptide receptor 2	Chr9:35792154-35809732	ENSMUSG00000028469	Chr4:43631935-43651244	3118.08	0.242147	1.18275	0.000181863	0.0339713	up	hormone binding;natriuretic peptide receptor activity;guanylate cyclase complex, soluble;cellular response to granulocyte macrophage colony-stimulating factor stimulus;receptor guanylyl cyclase signaling pathway;ossification;phosphorus-oxygen lyase activity;cyclic nucleotide biosynthetic process;cGMP biosynthetic process;guanylate cyclase activity;regulation of blood pressure;cell surface recepto…	Purine metabolism;cGMP-PKG signaling pathway;Vascular smooth muscle contraction;Oxytocin signaling pathway;
FOXRED2	FAD dependent oxidoreductase domain containing 2	Chr22:36487190-36507101	ENSMUSG00000016552	Chr15:77940522-77956722	2441.03	0.175069	1.12902	0.000204501	0.0378141	up	glycoprotein binding;endoplasmic reticulum lumen;protein binding;ER-associated ubiquitin-dependent protein catabolic process;monooxygenase activity;oxidoreductase activity;flavin adenine dinucleotide binding;oxidation-reduction process;
MDGA2	MAM domain containing glycosylphosphatidylinositol anchor 2	Chr14:46839629-47674954	ENSMUSG00000034912	Chr12:66466060-67222549	1597.56	0.24977	1.18902	0.000212642	0.0389262	up	spinal cord motor neuron differentiation;protein binding;anchored component of membrane;membrane;plasma membrane;integral component of membrane;
CALB1	calbindin 1	Chr8:90058608-90095475	ENSMUSG00000028222	Chr4:15881264-15908064	249.092	-0.842893	-1.79364	0.000216825	0.0392991	down	cytosolic calcium ion homeostasis;neuronal cell body;short-term memory;dendrite;long-term memory;vitamin D binding;extracellular exosome;axon;protein binding;synapse;cytosol;zinc ion binding;nucleus;calcium ion binding;cytoplasm;intracellular;cellular response to organic substance;neuron projection;locomotory behavior;retina development in camera-type eye;cell body;metanephric collecting duct dev…	Endocrine and other factor-regulated calcium reabsorption;
AFF3	AF4/FMR2 family member 3	Chr2:99545419-100142739	ENSMUSG00000037138	Chr1:38177326-38664955	7586.07	0.190979	1.14154	0.000229008	0.0411002	up	embryonic hindlimb morphogenesis;response to tumor necrosis factor;double-stranded DNA binding;regulation of transcription, DNA-templated;transcription, DNA-templated;nucleoplasm;cytoplasm;nucleus;
RAN	RAN, member RAS oncogene family	Chr12:130871879-130877678	ENSMUSG00000029430	Chr5:129020069-129024323	10271.3	0.149627	1.10928	0.000233915	0.0415732	up	pre-miRNA transporter activity;pre-miRNA binding;protein localization to nucleolus;RNA nuclear export complex;pre-miRNA export from nucleus;androgen receptor binding;gene silencing by RNA;protein export from nucleus;ribosomal small subunit export from nucleus;protein import into nucleus, translocation;positive regulation of protein binding;GDP binding;ribosomal large subunit export from nucleus;r…	Ribosome biogenesis in eukaryotes;RNA transport;HTLV-I infection;Epstein-Barr virus infection;
SLC4A8	solute carrier family 4 member 8	Chr12:51391317-51515763	ENSMUSG00000023032	Chr15:100761747-100823968	4320.91	0.220336	1.165	0.000240085	0.0422596	up	anion transmembrane transporter activity;bicarbonate transport;ion transport;anion transmembrane transport;inorganic anion exchanger activity;sodium ion transport;anion transport;transport;membrane;transmembrane transport;transporter activity;plasma membrane;integral component of membrane;neuron projection;neuronal cell body membrane;
ALAS2	5'-aminolevulinate synthase 2	ChrX:55009055-55031064	ENSMUSG00000025270	ChrX:150547375-150570638	450.72	0.618923	1.53573	0.000243265	0.0424115	up	protoporphyrinogen IX biosynthetic process;hemoglobin biosynthetic process;oxygen homeostasis;erythrocyte differentiation;heme biosynthetic process;porphyrin-containing compound metabolic process;5-aminolevulinate synthase activity;glycine binding;response to hypoxia;small molecule metabolic process;coenzyme binding;protein binding;mitochondrial matrix;cellular iron ion homeostasis;tetrapyrrole b…	Glycine, serine and threonine metabolism;Porphyrin and chlorophyll metabolism;Metabolic pathways;
USP7	ubiquitin specific peptidase 7	Chr16:8892094-8964514	ENSMUSG00000022710	Chr16:8689595-8792308	9232.74	0.189292	1.1402	0.000252484	0.043196	up	maintenance of DNA methylation;nuclear body;transcription-coupled nucleotide-excision repair;p53 binding;regulation of sequence-specific DNA binding transcription factor activity;PML body;negative regulation of NF-kappaB transcription factor activity;viral process;protein binding;DNA repair;cytosol;multicellular organismal development;nucleotide-excision repair;transcription factor binding;cystei…	FoxO signaling pathway;Herpes simplex infection;Epstein-Barr virus infection;Viral carcinogenesis;
SOS2	SOS Ras/Rho guanine nucleotide exchange factor 2	Chr14:50117120-50231558	ENSMUSG00000034801	Chr12:69583762-69681852	2477.61	0.329241	1.25635	0.000280416	0.0467783	up	neurotrophin TRK receptor signaling pathway;apoptotic signaling pathway;protein binding;regulation of small GTPase mediated signal transduction;guanyl-nucleotide exchange factor activity;positive regulation of apoptotic process;cytosol;regulation of Rho protein signal transduction;Rho guanyl-nucleotide exchange factor activity;protein heterodimerization activity;positive regulation of GTPase acti…	MAPK signaling pathway;ErbB signaling pathway;Ras signaling pathway;Chemokine signaling pathway;FoxO signaling pathway;Phospholipase D signaling pathway;PI3K-Akt signaling pathway;Dorso-ventral axis formation;Focal adhesion;Gap junction;Jak-STAT signaling pathway;Natural killer cell mediated cytotoxicity;T cell receptor signaling pathway;B cell receptor signaling pathway;Fc epsilon RI signaling p…
PROSER1	proline and serine rich 1	Chr13:39009866-39038076	ENSMUSG00000049504	Chr3:53463666-53481755	2513.01	0.195973	1.1455	0.000281089	0.0467783	up
HEMK1	HemK methyltransferase family member 1	Chr3:50569152-50596168	ENSMUSG00000032579	Chr9:107327084-107338350	605.111	0.267606	1.20381	0.000287895	0.0473325	up	N-methyltransferase activity;protein methyltransferase activity;DNA methylation;protein binding;protein methylation;methyltransferase activity;methylation;mitochondrion;nucleic acid binding;DNA binding;
DCAF17	DDB1 and CUL4 associated factor 17	Chr2:171434217-171485052	ENSMUSG00000041966	Chr2:71055328-71099142	1389.41	0.212831	1.15896	0.00028959	0.0473325	up	Cul4-RING E3 ubiquitin ligase complex;protein ubiquitination;nucleolus;integral component of membrane;
FAM19A1	family with sequence similarity 19 member A1, C-C motif chemokine like	Chr3:68004216-68545625	ENSMUSG00000059187	Chr6:96113154-96657198	269.871	-0.624354	-1.54152	0.000293321	0.047518	down	protein binding;endoplasmic reticulum;extracellular region;
MKL1	megakaryoblastic leukemia (translocation) 1	Chr22:40410281-40636702	ENSMUSG00000042292	Chr15:81012281-81190757	2138.23	0.205025	1.15271	0.000309575	0.0497112	up	smooth muscle cell differentiation;leucine zipper domain binding;RNA polymerase II transcription coactivator activity;positive regulation of transcription via serum response element binding;protein binding;actin monomer binding;cytosol;transcription coactivator activity;positive regulation of transcription from RNA polymerase II promoter;small GTPase mediated signal transduction;actin binding;tra…

## Sheet: Table S3
Supplementary Table 3. List of DEG (Differentially Expressed Gene) from RNA-Seq analysis results (Cyfip2-/-).
Differential expression analysis was carried out using DESeq2.
Gene information			RNA-seq probe information		DESeq2 results						Functional annotation
HGNC symbol	Full name	Position (human)	Ensembl ID (mouse)	Position (mouse)	baseMean	log2FC	FC	p-value	adjusted p-value	direction	GO terms	KEGG Pathway
CYFIP2	cytoplasmic FMR1 interacting protein 2	Chr5:157266079-157395595	ENSMUSG00000020340	Chr11:46193850-46312859	9211.66	-0.42361	-1.34128	6.66134e-16	1.22102e-11	down	activation of cysteine-type endopeptidase activity;positive regulation of proteolysis;neuron projection;vascular endothelial growth factor receptor signaling pathway;extracellular exosome;innate immune response;Fc-gamma receptor signaling pathway involved in phagocytosis;protein binding;synapse;single organismal cell-cell adhesion;cell junction;perinuclear region of cytoplasm;cytosol;apoptotic pr…	RNA transport;Regulation of actin cytoskeleton;
FNDC9	fibronectin type III domain containing 9	Chr5:157341600-157345721	ENSMUSG00000048721	Chr11:46235531-46239872	22.7252	-4.07725	-16.8801	1.73195e-13	1.58733e-09	down	protein binding;integral component of membrane;
ALOXE3	arachidonate lipoxygenase 3	Chr17:8095900-8119047	ENSMUSG00000020892	Chr11:69125896-69149115	104.884	1.12773	2.18514	5.41889e-09	3.31094e-05	up	protein binding;oxidoreductase activity, acting on single donors with incorporation of molecular oxygen, incorporation of two atoms of oxygen;oxidation-reduction process;metal ion binding;hepoxilin A3 synthase activity;sensory perception of pain;linoleic acid metabolic process;peroxisome proliferator activated receptor signaling pathway;hepoxilin biosynthetic process;lipoxygenase pathway;establis…
LAMC1	laminin subunit gamma 1	Chr1:183023460-183145592	ENSMUSG00000026478	Chr1:153218922-153332786	4173.97	0.621044	1.53799	1.01121e-08	4.63387e-05	up	laminin-1 complex;hemidesmosome assembly;endoderm development;positive regulation of epithelial cell proliferation;laminin-11 complex;laminin-10 complex;extracellular matrix organization;basement membrane;extracellular matrix disassembly;extracellular exosome;protein complex assembly;protein binding;cell migration;extracellular matrix;substrate adhesion-dependent cell spreading;cell adhesion;extr…	PI3K-Akt signaling pathway;Focal adhesion;ECM-receptor interaction;Prion diseases;Toxoplasmosis;Amoebiasis;Pathways in cancer;Small cell lung cancer;
C1QTNF7	C1q and TNF related 7	Chr4:15339818-15446166	ENSMUSG00000061535	Chr5:43515538-43618803	30.9839	2.09771	4.28029	1.44621e-08	4.82372e-05	up	protein binding;collagen trimer;
PTPRB	protein tyrosine phosphatase, receptor type B	Chr12:70515866-70637440	ENSMUSG00000020154	Chr10:116275523-116389535	841.202	0.46169	1.37715	1.57896e-08	4.82372e-05	up	transmembrane receptor protein tyrosine phosphatase activity;receptor complex;phosphate-containing compound metabolic process;protein binding;integral component of plasma membrane;protein dephosphorylation;phosphatase activity;dephosphorylation;peptidyl-tyrosine dephosphorylation;protein tyrosine phosphatase activity;angiogenesis;	Adherens junction;
CLEC14A	C-type lectin domain containing 14A	Chr14:38254103-38256369	ENSMUSG00000045930	Chr12:58264720-58269290	534.73	0.663455	1.58387	1.23566e-07	0.00028312	up	extracellular exosome;carbohydrate binding;integral component of membrane;
CAPN11	calpain 11	Chr6:44158811-44184402	ENSMUSG00000058626	Chr17:45630204-45659325	77.0147	-4.91558	-30.1812	2.43517e-07	0.000495963	down	calcium-dependent cysteine-type endopeptidase activity;intracellular;proteolysis;acrosomal vesicle;peptidase activity;calcium ion binding;
MYCBP	MYC binding protein	Chr1:38862964-38874105	ENSMUSG00000028647	Chr4:123904832-123912269	187.299	-0.829782	-1.77742	3.18715e-07	0.000540732	down	protein binding;spermatogenesis;transcription coactivator activity;mitochondrion;regulation of transcription, DNA-templated;transcription, DNA-templated;cytoplasm;nucleus;
VWF	von Willebrand factor	Chr12:5948874-6124770	ENSMUSG00000001930	Chr6:125546774-125686679	1546.5	0.412778	1.33125	3.24498e-07	0.000540732	up	Weibel-Palade body;hemostasis;immunoglobulin binding;blood coagulation, intrinsic pathway;cell-substrate adhesion;integrin binding;platelet alpha granule lumen;platelet degranulation;response to wounding;glycoprotein binding;protease binding;platelet alpha granule;protein N-terminus binding;collagen binding;chaperone binding;blood coagulation;extracellular matrix organization;protein homodimeriza…	PI3K-Akt signaling pathway;Focal adhesion;ECM-receptor interaction;Complement and coagulation cascades;Platelet activation;
MRPS23	mitochondrial ribosomal protein S23	Chr17:57834781-57850056	ENSMUSG00000023723	Chr11:88204388-88211507	1165.03	-0.44174	-1.35824	3.71513e-07	0.000567486	down	mitochondrial translational termination;mitochondrial translational elongation;mitochondrial translational initiation;mitochondrial translation;intermediate filament cytoskeleton;organelle organization;poly(A) RNA binding;protein binding;mitochondrial inner membrane;mitochondrion;ribosome;nuclear membrane;translation;structural constituent of ribosome;
ADGRF5	adhesion G protein-coupled receptor F5	Chr6:46852512-46954943	ENSMUSG00000056492	Chr17:43360451-43459557	988.942	0.49551	1.40982	5.66029e-07	0.000741093	up	cell surface;cytoplasmic vesicle;protein binding;cell surface receptor signaling pathway;transmembrane signaling receptor activity;G-protein coupled receptor activity;membrane;plasma membrane;G-protein coupled receptor signaling pathway;integral component of membrane;glucose homeostasis;fat cell differentiation;apical part of cell;energy reserve metabolic process;surfactant homeostasis;regulation…
CD93	CD93 molecule	Chr20:23079349-23086340	ENSMUSG00000027435	Chr2:148436640-148443563	1657.61	0.466042	1.38131	9.39763e-07	0.00114839	up	complement component C1q binding;negative regulation of blood coagulation;positive regulation of defense response to virus by host;mitophagy in response to mitochondrial depolarization;xenophagy;macrophage activation;viral process;protein binding;single organismal cell-cell adhesion;integral component of plasma membrane;receptor activity;carbohydrate binding;phagocytosis;transmembrane signaling r…
COL4A2	collagen type IV alpha 2 chain	Chr13:110305812-110513027	ENSMUSG00000031503	Chr8:11312805-11449287	7275.67	0.48138	1.39608	1.13105e-06	0.00129576	up	endodermal cell differentiation;collagen type IV trimer;endoplasmic reticulum lumen;collagen catabolic process;extracellular matrix organization;negative regulation of angiogenesis;extracellular matrix disassembly;extracellular exosome;protein binding;receptor-mediated endocytosis;extracellular matrix;collagen trimer;extracellular matrix structural constituent;intracellular membrane-bounded organ…	PI3K-Akt signaling pathway;Focal adhesion;ECM-receptor interaction;AGE-RAGE signaling pathway in diabetic complications;Protein digestion and absorption;Amoebiasis;Pathways in cancer;Small cell lung cancer;
RPS12	ribosomal protein S12	Chr6:132814441-132817564	ENSMUSG00000061983	Chr10:23785183-23787275	495.323	1.18477	2.27327	1.94954e-06	0.00193082	up	viral transcription;viral life cycle;viral process;gene expression;cellular protein metabolic process;translational initiation;cytosolic small ribosomal subunit;poly(A) RNA binding;nuclear-transcribed mRNA catabolic process, nonsense-mediated decay;translational termination;SRP-dependent cotranslational protein targeting to membrane;cytosol;intracellular;membrane;ribosome;translational elongation…	Ribosome;
RBMS1	RNA binding motif single stranded interacting protein 1	Chr2:160272151-160493794	ENSMUSG00000026970	Chr2:60750193-60963192	896.874	0.426501	1.34397	1.99926e-06	0.00193082	up	double-stranded DNA binding;poly(A) RNA binding;protein binding;RNA processing;DNA replication;single-stranded DNA binding;RNA binding;nucleic acid binding;nucleotide binding;nucleus;
HEYL	hes related family bHLH transcription factor with YRPW motif-like	Chr1:39624153-39639945	ENSMUSG00000032744	Chr4:123233556-123249875	418.876	0.676047	1.59776	2.10673e-06	0.00193082	up	AF-1 domain binding;microsatellite binding;transcription factor activity, protein binding;mesenchymal cell development;pulmonary valve morphogenesis;cardiac ventricle morphogenesis;endocardial cushion morphogenesis;atrioventricular valve morphogenesis;transcription factor activity, RNA polymerase II core promoter sequence-specific;negative regulation of androgen receptor activity;negative regulat…
DPM1	dolichyl-phosphate mannosyltransferase subunit 1, catalytic	Chr20:50934867-50958555	ENSMUSG00000078919	Chr2:168209048-168230591	773.608	0.411909	1.33045	3.05608e-06	0.00266752	up	protein mannosylation;dolichol-phosphate-mannose synthase complex;dolichol metabolic process;dolichyl-phosphate beta-D-mannosyltransferase activity;dolichyl-phosphate-mannose-protein mannosyltransferase activity;C-terminal protein lipidation;post-translational protein modification;dolichol-linked oligosaccharide biosynthetic process;protein N-linked glycosylation;protein O-linked mannosylation;ce…	N-Glycan biosynthesis;Metabolic pathways;
TMEM254	transmembrane protein 254	Chr10:80078646-80092557	ENSMUSG00000072676	Chr14:25923300-25927672	735.786	-0.364387	-1.28733	4.41792e-06	0.00368093	down	integral component of membrane;
ZC3HAV1	zinc finger CCCH-type containing, antiviral 1	Chr7:139043520-139109719	ENSMUSG00000029826	Chr6:38305286-38354603	152.7	0.629209	1.54672	5.40515e-06	0.00430767	up	positive regulation of RIG-I signaling pathway;positive regulation of interferon-beta production;positive regulation of interferon-alpha production;negative regulation of viral genome replication;positive regulation of mRNA catabolic process;innate immune response;poly(A) RNA binding;protein binding;positive regulation of I-kappaB kinase/NF-kappaB signaling;defense response to virus;Golgi apparat…
FGFR1	fibroblast growth factor receptor 1	Chr8:38411138-38468834	ENSMUSG00000031565	Chr8:25513654-25575718	7102.67	-0.313171	-1.24244	5.90449e-06	0.00450955	down	skeletal system morphogenesis;chordate embryonic development;positive regulation of phospholipase C activity;positive regulation of phospholipase activity;positive regulation of MAP kinase activity;neuron migration;positive regulation of phosphatidylinositol 3-kinase signaling;positive regulation of MAPK cascade;fibroblast growth factor binding;protein autophosphorylation;positive regulation of n…	MAPK signaling pathway;Ras signaling pathway;Rap1 signaling pathway;PI3K-Akt signaling pathway;Adherens junction;Signaling pathways regulating pluripotency of stem cells;Regulation of actin cytoskeleton;Pathways in cancer;Proteoglycans in cancer;Prostate cancer;Melanoma;Central carbon metabolism in cancer;
ENG	endoglin	Chr9:127815012-127854756	ENSMUSG00000026814	Chr2:32646595-32682669	1411.21	0.425173	1.34273	6.22091e-06	0.00456117	up	transforming growth factor beta receptor homodimeric complex;venous blood vessel morphogenesis;negative regulation of protein autophosphorylation;central nervous system vasculogenesis;transforming growth factor beta receptor, cytoplasmic mediator activity;transforming growth factor beta-activated receptor activity;positive regulation of systemic arterial blood pressure;smooth muscle tissue develo…
ELF5	E74 like ETS transcription factor 5	Chr11:34478793-34513805	ENSMUSG00000027186	Chr2:103411688-103450989	18.4087	2.92703	7.60541	7.34576e-06	0.00507376	up	RNA polymerase II transcription factor activity, sequence-specific DNA binding;cell proliferation;cell differentiation;sequence-specific DNA binding;transcription factor activity, sequence-specific DNA binding;regulation of transcription, DNA-templated;regulation of transcription from RNA polymerase II promoter;nucleus;cytoplasm;positive regulation of transcription from RNA polymerase II promoter…	PI3K-Akt signaling pathway;AMPK signaling pathway;Prolactin signaling pathway;
BECN1	beclin 1	Chr17:42810134-42833350	ENSMUSG00000035086	Chr11:101285952-101302286	3015.53	-0.227663	-1.17094	7.47362e-06	0.00507376	down	positive regulation of mitophagy;positive regulation of attachment of mitotic spindle microtubules to kinetochore;phosphatidylinositol 3-kinase complex, class III;receptor catabolic process;cellular defense response;macroautophagy;mitotic metaphase plate congression;cellular response to glucose starvation;regulation of cytokinesis;negative regulation of cell death;mitophagy in response to mitocho…	Regulation of autophagy;
HIF3A	hypoxia inducible factor 3 alpha subunit	Chr19:46297046-46343433	ENSMUSG00000004328	Chr7:17031507-17062427	722.503	0.627287	1.54466	9.18413e-06	0.00601233	up	protein dimerization activity;regulation of transcription from RNA polymerase II promoter in response to hypoxia;cellular response to hypoxia;nuclear speck;RNA polymerase II transcription factor activity, sequence-specific DNA binding;cytosol;transcription coactivator activity;positive regulation of transcription from RNA polymerase II promoter;negative regulation of nucleic acid-templated transc…
C19orf44	chromosome 19 open reading frame 44	Chr19:16496311-16521352	ENSMUSG00000052794	Chr8:72443880-72461001	838.547	-0.373294	-1.29531	1.02465e-05	0.0063434	down	protein binding;
PCDHGB1	protocadherin gamma subfamily B, 1	Chr5:141350102-141512979	ENSMUSG00000103037	Chr18:37680233-37841870	913.578	-0.352304	-1.2766	1.0382e-05	0.0063434	down	cell adhesion;homophilic cell adhesion via plasma membrane adhesion molecules;membrane;plasma membrane;integral component of membrane;calcium ion binding;protein binding;growth cone;
MAP3K1	mitogen-activated protein kinase kinase kinase 1	Chr5:56815574-56896152	ENSMUSG00000021754	Chr13:111746428-111808993	684.767	0.564996	1.47938	1.09778e-05	0.00649104	up	binding;toll-like receptor 5 signaling pathway;stress-activated protein kinase signaling cascade;cellular response to mechanical stimulus;toll-like receptor TLR6:TLR2 signaling pathway;toll-like receptor TLR1:TLR2 signaling pathway;toll-like receptor 4 signaling pathway;toll-like receptor 2 signaling pathway;activation of protein kinase activity;toll-like receptor 9 signaling pathway;toll-like re…	MAPK signaling pathway;Ubiquitin mediated proteolysis;RIG-I-like receptor signaling pathway;Neurotrophin signaling pathway;GnRH signaling pathway;Hepatitis B;HTLV-I infection;
EHD2	EH domain containing 2	Chr19:47713343-47743134	ENSMUSG00000074364	Chr7:15946958-15967567	487.72	0.442183	1.35866	1.17493e-05	0.00673012	up	positive regulation of endocytic recycling;positive regulation of myoblast fusion;protein localization to plasma membrane;caveola;blood coagulation;recycling endosome membrane;endosome membrane;extracellular exosome;membrane tubulation;protein binding;extrinsic component of membrane;cytosol;plasma membrane;hydrolase activity;metabolic process;endocytic recycling;GTP binding;nucleic acid binding;n…	Endocytosis;
PDE7B	phosphodiesterase 7B	Chr6:135851696-136195574	ENSMUSG00000019990	Chr10:20398004-20725078	265.948	0.882394	1.84343	1.23107e-05	0.00683806	up	cAMP catabolic process;phosphoric diester hydrolase activity;synaptic transmission;cytosol;3',5'-cyclic-nucleotide phosphodiesterase activity;signal transduction;metal ion binding;3',5'-cyclic-AMP phosphodiesterase activity;metabolic process;	Purine metabolism;Morphine addiction;
PECAM1	platelet and endothelial cell adhesion molecule 1	Chr17:64319415-64413776	ENSMUSG00000020717	Chr11:106654217-106750628	1181.03	0.415093	1.33338	1.65333e-05	0.00865873	up	protein binding;integral component of membrane;external side of plasma membrane;cell periphery;plasma membrane;membrane;regulation of cell migration;membrane raft;Rho protein signal transduction;wound healing;smooth muscle contractile fiber;positive regulation of tyrosine phosphorylation of Stat5 protein;	Cell adhesion molecules (CAMs);Leukocyte transendothelial migration;Malaria;
ITIH5	inter-alpha-trypsin inhibitor heavy chain family member 5	Chr10:7559270-7666998	ENSMUSG00000025780	Chr2:10153571-10256529	1104.67	0.513934	1.42794	2.05114e-05	0.0104437	up	hyaluronan metabolic process;serine-type endopeptidase inhibitor activity;negative regulation of endopeptidase activity;
RLBP1	retinaldehyde binding protein 1	Chr15:89209869-89221751	ENSMUSG00000039194	Chr7:79374870-79387048	2768.63	-0.247487	-1.18714	2.46256e-05	0.0117468	down	retinol binding;phototransduction, visible light;retinoid metabolic process;cellular_component;vitamin A metabolic process;visual perception;cytosol;transport;transporter activity;11-cis retinal binding;cell body;intracellular;
CYP1B1	cytochrome P450 family 1 subfamily B member 1	Chr2:38066973-38109902	ENSMUSG00000024087	Chr17:79706953-79715041	546.026	0.746937	1.67823	2.47283e-05	0.0117468	up	membrane lipid catabolic process;trabecular meshwork development;retinal metabolic process;cellular response to hydrogen peroxide;omega-hydroxylase P450 pathway;epoxygenase P450 pathway;positive regulation of JAK-STAT cascade;positive regulation of vascular endothelial growth factor production;estrogen metabolic process;retinal blood vessel morphogenesis;regulation of reactive oxygen species meta…	Steroid hormone biosynthesis;Tryptophan metabolism;Metabolism of xenobiotics by cytochrome P450;Ovarian steroidogenesis;Chemical carcinogenesis;MicroRNAs in cancer;
RASSF9	Ras association domain family member 9	Chr12:85800697-85836570	ENSMUSG00000044921	Chr10:102512222-102549736	123.679	0.625183	1.54241	2.90654e-05	0.0128303	up	trans-Golgi network transport vesicle membrane;protein targeting;extracellular exosome;protein binding;endosome;cytosol;endosomal transport;signal transduction;transporter activity;
COL4A1	collagen type IV alpha 1 chain	Chr13:110148963-110307149	ENSMUSG00000031502	Chr8:11198423-11312826	11291.1	0.48503	1.39961	2.93984e-05	0.0128303	up	extracellular matrix constituent conferring elasticity;collagen type IV trimer;platelet-derived growth factor binding;retinal blood vessel morphogenesis;blood vessel morphogenesis;renal tubule morphogenesis;basement membrane organization;patterning of blood vessels;endoplasmic reticulum lumen;collagen catabolic process;extracellular matrix organization;basement membrane;extracellular matrix disas…	PI3K-Akt signaling pathway;Focal adhesion;ECM-receptor interaction;AGE-RAGE signaling pathway in diabetic complications;Protein digestion and absorption;Amoebiasis;Pathways in cancer;Small cell lung cancer;
TBX18	T-box 18	Chr6:84687351-84764519	ENSMUSG00000032419	Chr9:87702800-87731260	586.055	0.718646	1.64564	3.22013e-05	0.0137267	up	transcription factor activity, sequence-specific DNA binding;regulation of transcription, DNA-templated;transcription, DNA-templated;DNA binding;nucleus;renal system development;negative regulation of canonical Wnt signaling pathway involved in neural plate anterior/posterior pattern formation;protein homodimerization activity;transcription regulatory region sequence-specific DNA binding;RNA poly…
PRND	prion like protein doppel	Chr20:4721910-4728460	ENSMUSG00000027338	Chr2:131950861-131956130	307.866	0.655529	1.57519	3.3127e-05	0.0138004	up	cellular copper ion homeostasis;copper ion binding;anchored component of membrane;protein homooligomerization;membrane;plasma membrane;
CAVIN1	caveolae associated protein 1	null	ENSMUSG00000004044	Chr11:100956733-100970887	1125.78	0.493646	1.408	3.44778e-05	0.0140439	up
POSTN	periostin	Chr13:37562583-37598844	ENSMUSG00000027750	Chr3:54361109-54391037	1510	0.768959	1.70404	3.57961e-05	0.0140498	up	protein binding;cell adhesion molecule binding;extracellular matrix organization;skeletal system development;heparin binding;trans-Golgi network;extracellular matrix;cell adhesion;proteinaceous extracellular matrix;extracellular space;regulation of Notch signaling pathway;tissue development;cytoplasm;response to estradiol;cellular response to transforming growth factor beta stimulus;response to h…
NID2	nidogen 2	Chr14:52004803-52069228	ENSMUSG00000021806	Chr14:19751265-19811787	2274.32	0.603846	1.51976	3.60251e-05	0.0140498	up	basement membrane organization;collagen binding;extracellular matrix organization;basement membrane;extracellular exosome;protein binding;cell-matrix adhesion;extracellular matrix;cell adhesion;extracellular region;calcium ion binding;proteinaceous extracellular matrix;
ICAM2	intercellular adhesion molecule 2	Chr17:64002594-64020634	ENSMUSG00000001029	Chr11:106377656-106388075	159.801	0.555749	1.46993	3.93522e-05	0.0147925	up	protein binding;single organismal cell-cell adhesion;integral component of membrane;integrin binding;extracellular matrix organization;stimulatory C-type lectin receptor signaling pathway;extracellular exosome;regulation of immune response;innate immune response;cell adhesion;membrane;plasma membrane;cell periphery;integral component of plasma membrane;uropod;	cAMP signaling pathway;Cell adhesion molecules (CAMs);Natural killer cell mediated cytotoxicity;
COL1A2	collagen type I alpha 2 chain	Chr7:94394561-94431232	ENSMUSG00000029661	Chr6:4504814-4541544	5001.58	0.624203	1.54136	4.08803e-05	0.0149867	up	odontogenesis;collagen type I trimer;platelet-derived growth factor binding;blood vessel development;collagen fibril organization;skin morphogenesis;endoplasmic reticulum lumen;leukocyte migration;transforming growth factor beta receptor signaling pathway;blood coagulation;collagen catabolic process;extracellular matrix organization;extracellular matrix disassembly;skeletal system development;ext…	PI3K-Akt signaling pathway;Focal adhesion;ECM-receptor interaction;Platelet activation;AGE-RAGE signaling pathway in diabetic complications;Protein digestion and absorption;Amoebiasis;
HOPX	HOP homeobox	Chr4:56647988-56681899	ENSMUSG00000059325	Chr5:77086988-77115121	413.538	-0.522824	-1.43676	4.19219e-05	0.0150672	down	trophectodermal cell differentiation;protein binding;negative regulation of cell differentiation;transcription, DNA-templated;regulation of transcription from RNA polymerase II promoter;DNA binding;nucleus;negative regulation of transcription from RNA polymerase II promoter;heart development;histone deacetylation;regulation of heart contraction;lung alveolus development;regulation of protein bind…
ADAM12	ADAM metallopeptidase domain 12	Chr10:126012381-126388455	ENSMUSG00000054555	Chr7:133883199-134232146	978.061	0.53244	1.44637	5.55448e-05	0.0188544	up	SH3 domain binding;epidermal growth factor receptor signaling pathway;protein binding;myoblast fusion;metallopeptidase activity;metalloendopeptidase activity;cell adhesion;proteolysis;plasma membrane;mitochondrion;extracellular region;nucleoplasm;integral component of membrane;zinc ion binding;
MRPS11	mitochondrial ribosomal protein S11	Chr15:88467453-88480773	ENSMUSG00000030611	Chr7:78783119-78792989	624.527	-0.320179	-1.24849	6.98231e-05	0.0232701	down	ribosome;translation;structural constituent of ribosome;small ribosomal subunit rRNA binding;DNA damage response, detection of DNA damage;mitochondrial translational termination;mitochondrial translational elongation;mitochondrial translational initiation;mitochondrial translation;mitochondrial small ribosomal subunit;maturation of SSU-rRNA from tricistronic rRNA transcript (SSU-rRNA, 5.8S rRNA, …	Ribosome;
MECOM	MDS1 and EVI1 complex locus	Chr3:169083499-169663618	ENSMUSG00000027684	Chr3:29951296-30548008	206.878	0.816048	1.76058	7.75826e-05	0.0253944	up	negative regulation of programmed cell death;hematopoietic stem cell proliferation;negative regulation of JNK cascade;histone deacetylase complex;aggresome;protein homodimerization activity;nuclear speck;chromatin organization;protein binding;positive regulation of transcription, DNA-templated;cell differentiation;cytosol;Golgi apparatus;negative regulation of transcription, DNA-templated;regulat…	MAPK signaling pathway;Pathways in cancer;Chronic myeloid leukemia;
CPNE8	copine 8	Chr12:38646822-38907430	ENSMUSG00000052560	Chr15:90487482-90679432	249.266	0.432947	1.34999	8.04299e-05	0.0258646	up	extracellular exosome;biological_process;molecular_function;protein binding;
PDLIM1	PDZ and LIM domain 1	Chr10:95237572-95291024	ENSMUSG00000055044	Chr19:40221173-40271842	86.2312	0.988285	1.98383	9.1008e-05	0.0283213	up	protein binding;focal adhesion;response to oxidative stress;cytoskeleton;zinc ion binding;cytoplasm;regulation of transcription, DNA-templated;transcription factor complex;transcription coactivator activity;response to hypoxia;
SLC4A10	solute carrier family 4 member 10	Chr2:161424332-161985282	ENSMUSG00000026904	Chr2:62046462-62326730	1521.42	0.606612	1.52268	9.11596e-05	0.0283213	up	anion transmembrane transporter activity;bicarbonate transport;symporter activity;ion transport;anion transmembrane transport;inorganic anion exchanger activity;sodium ion transport;anion transport;chloride transport;transport;membrane;transmembrane transport;transporter activity;plasma membrane;integral component of membrane;anion:anion antiporter activity;hydrogen ion transmembrane transport;ne…
BGN	biglycan	ChrX:153494939-153509554	ENSMUSG00000031375	ChrX:73483602-73495933	1949.23	0.612259	1.52865	9.72117e-05	0.0296982	up	dermatan sulfate biosynthetic process;chondroitin sulfate catabolic process;chondroitin sulfate biosynthetic process;negative regulation of cyclin-dependent protein kinase activity;negative regulation of protein kinase activity;protein kinase inhibitor activity;lysosomal lumen;chondroitin sulfate metabolic process;Golgi lumen;negative regulation of JAK-STAT cascade;glycosaminoglycan metabolic pro…
SERPINB9	serpin family B member 9	Chr6:2887266-2903280	ENSMUSG00000045827	Chr13:33003250-33017957	78.536	0.756573	1.68947	9.98989e-05	0.0300188	up	negative regulation by symbiont of host apoptotic process;mast cell mediated immunity;protection from natural killer cell mediated cytotoxicity;response to bacterium;cysteine-type endopeptidase inhibitor activity involved in apoptotic process;protease binding;cellular response to estrogen stimulus;positive regulation of gene expression;extracellular exosome;negative regulation of cysteine-type en…	Amoebiasis;
SEMA3B	semaphorin 3B	Chr3:50267558-50277546	ENSMUSG00000057969	Chr9:107597674-107609229	97.0255	-0.69409	-1.61786	0.000104577	0.0309178	down	protein binding;negative chemotaxis;negative regulation of axon extension involved in axon guidance;chemorepellent activity;neuropilin binding;semaphorin receptor binding;neural crest cell migration;cell-cell signaling;extracellular exosome;positive regulation of cell migration;endoplasmic reticulum;membrane;semaphorin-plexin signaling pathway;axon guidance;extracellular space;	Axon guidance;
FASTKD2	FAST kinase domains 2	Chr2:206765357-206792509	ENSMUSG00000025962	Chr1:63730614-63754655	753.657	-0.319039	-1.2475	0.000109509	0.0315167	down	mitochondrial large ribosomal subunit assembly;ribonucleoprotein granule;cellular respiration;mitochondrial nucleoid;poly(A) RNA binding;mitochondrion;rRNA binding;protein phosphorylation;protein kinase activity;
NID1	nidogen 1	Chr1:235975830-236065162	ENSMUSG00000005397	Chr13:13437551-13512269	3582.06	0.513352	1.42736	0.000110042	0.0315167	up	proteoglycan binding;basement membrane organization;collagen binding;extracellular matrix organization;basement membrane;extracellular matrix disassembly;extracellular exosome;protein binding;laminin binding;cell-matrix adhesion;extracellular matrix;extracellular region;calcium ion binding;cell periphery;proteinaceous extracellular matrix;basal lamina;glomerular basement membrane development;posi…
CXCL12	C-X-C motif chemokine ligand 12	Chr10:44370165-44386493	ENSMUSG00000061353	Chr6:117168535-117181367	3649.96	0.459739	1.37529	0.000116402	0.0328253	up	CXCR chemokine receptor binding;blood circulation;induction of positive chemotaxis;negative regulation of intrinsic apoptotic signaling pathway in response to DNA damage;chemoattractant activity;positive regulation of calcium ion import;positive chemotaxis;regulation of actin polymerization or depolymerization;positive regulation of T cell migration;negative regulation of leukocyte apoptotic proc…	Ribosome;Cytokine-cytokine receptor interaction;Chemokine signaling pathway;NF-kappa B signaling pathway;Axon guidance;Leukocyte transendothelial migration;Intestinal immune network for IgA production;Pathways in cancer;Rheumatoid arthritis;
ADGRA2	adhesion G protein-coupled receptor A2	Chr8:37784191-37844896	ENSMUSG00000031486	Chr8:27085583-27123436	1311.01	0.540446	1.45442	0.000122081	0.0339052	up	protein binding;regulation of chemotaxis;endothelial cell migration;central nervous system development;regulation of angiogenesis;sprouting angiogenesis;cell surface receptor signaling pathway;transmembrane signaling receptor activity;G-protein coupled receptor activity;membrane;plasma membrane;G-protein coupled receptor signaling pathway;integral component of membrane;cell surface;angiogenesis;p…
DCT	dopachrome tautomerase	Chr13:94436808-94479682	ENSMUSG00000022129	Chr14:118012790-118052244	163.684	-0.917796	-1.88923	0.000135446	0.0364837	down	melanin biosynthetic process from tyrosine;dopachrome isomerase activity;melanin biosynthetic process;melanosome membrane;melanosome;cellular nitrogen compound metabolic process;small molecule metabolic process;copper ion binding;epidermis development;cytosol;oxidoreductase activity;oxidation-reduction process;metabolic process;integral component of membrane;metal ion binding;cytoplasm;positive r…	Tyrosine metabolism;Metabolic pathways;Melanogenesis;
FOXC1	forkhead box C1	Chr6:1609972-1613897	ENSMUSG00000050295	Chr13:31806633-31812476	385.212	0.577747	1.49252	0.000137052	0.0364837	up	positive regulation of hematopoietic stem cell differentiation;positive regulation of hematopoietic progenitor cell differentiation;negative regulation of lymphangiogenesis;maintenance of lens transparency;mesenchymal cell development;nuclear heterochromatin;transcriptional activator activity, RNA polymerase II transcription regulatory region sequence-specific binding;negative regulation of mitot…
SNTB2	syntrophin beta 2	ChrCHR_HSCHR16_2_CTG3_1:69187122-69187739	ENSMUSG00000041308	Chr8:106935750-107019714	249.014	0.467575	1.38278	0.000137336	0.0364837	up	transport vesicle membrane;dystrophin-associated glycoprotein complex;protein complex;extracellular exosome;poly(A) RNA binding;protein binding;focal adhesion;calmodulin binding;structural molecule activity;microtubule;membrane;actin binding;cytoplasm;synapse;protein binding;structural molecule activity;
LAMC3	laminin subunit gamma 3	Chr9:131009082-131094473	ENSMUSG00000026840	Chr2:31887291-31946539	721.19	0.653459	1.57293	0.000154069	0.0403442	up	extracellular matrix organization;basement membrane;protein binding;structural molecule activity;cell adhesion;proteinaceous extracellular matrix;membrane;extracellular region;visual perception;retina development in camera-type eye;cell morphogenesis involved in differentiation;astrocyte development;	PI3K-Akt signaling pathway;Focal adhesion;ECM-receptor interaction;Toxoplasmosis;Amoebiasis;Pathways in cancer;Small cell lung cancer;
GPR88	G protein-coupled receptor 88	Chr1:100538137-100542018	ENSMUSG00000068696	Chr3:116249654-116253503	275.412	1.27992	2.42825	0.000157899	0.0405604	up	cellular_component;cell surface receptor signaling pathway;integral component of plasma membrane;G-protein coupled receptor activity;G-protein coupled receptor signaling pathway;integral component of membrane;neuronal action potential;neuromuscular process controlling balance;locomotory behavior;
FBLN5	fibulin 5	Chr14:91869412-91947987	ENSMUSG00000021186	Chr12:101746565-101819055	262.959	0.568374	1.48285	0.000160246	0.0405604	up	protein binding;calcium ion binding;secretion;elastic fiber assembly;elastic fiber;regulation of removal of superoxide radicals;integrin binding;protein localization to cell surface;extracellular matrix organization;protein homodimerization activity;extracellular exosome;cell-matrix adhesion;extracellular matrix;proteinaceous extracellular matrix;protein C-terminus binding;extracellular region;ex…
COL6A1	collagen type VI alpha 1 chain	Chr21:45981737-46005050	ENSMUSG00000001119	Chr10:76708792-76726168	1308.43	0.580652	1.49553	0.000161534	0.0405604	up	collagen type VI trimer;endodermal cell differentiation;platelet-derived growth factor binding;protein heterotrimerization;osteoblast differentiation;endoplasmic reticulum lumen;lysosomal membrane;protein complex;collagen catabolic process;extracellular matrix organization;extracellular matrix disassembly;extracellular exosome;extracellular matrix;cell adhesion;membrane;extracellular region;axon …	PI3K-Akt signaling pathway;Focal adhesion;ECM-receptor interaction;Protein digestion and absorption;
ALX4	ALX homeobox 4	Chr11:44260444-44310166	ENSMUSG00000040310	Chr2:93642384-93681339	362.557	1.02796	2.03914	0.000173757	0.0425781	up	hair follicle development;skeletal system development;sequence-specific DNA binding;regulation of transcription, DNA-templated;DNA binding;nucleus;transcription factor activity, sequence-specific DNA binding;protein heterodimerization activity;protein binding;positive regulation of transcription from RNA polymerase II promoter;transcription factor complex;regulation of transcription from RNA poly…
ITGB4	integrin subunit beta 4	Chr17:75721328-75757818	ENSMUSG00000020758	Chr11:115974709-116008412	118.791	0.762847	1.69684	0.000174215	0.0425781	up	amelogenesis;nail development;hemidesmosome;hemidesmosome assembly;skin development;renal system development;cell junction assembly;mesodermal cell differentiation;response to wounding;G-protein coupled receptor binding;extracellular matrix organization;cell surface;digestive tract development;receptor complex;extracellular exosome;cell leading edge;protein binding;autophagy;cell communication;ce…	PI3K-Akt signaling pathway;Focal adhesion;ECM-receptor interaction;Regulation of actin cytoskeleton;Hypertrophic cardiomyopathy (HCM);Arrhythmogenic right ventricular cardiomyopathy (ARVC);Dilated cardiomyopathy;
UBC	ubiquitin C	Chr12:124911604-124917368	ENSMUSG00000008348	Chr5:125385965-125390202	22213	-0.152287	-1.11133	0.000182807	0.04409	down	error-free translesion synthesis;regulation of type I interferon production;nucleotide-excision repair, DNA gap filling;nucleotide-excision repair, DNA damage recognition;global genome nucleotide-excision repair;DNA damage response, detection of DNA damage;error-prone translesion synthesis;macromitophagy;macroautophagy;nucleotide-excision repair, DNA incision;transcription-coupled nucleotide-exci…	PPAR signaling pathway;
TNS1	tensin 1	Chr2:217799789-218002995	ENSMUSG00000055322	Chr1:73910231-74124449	1412.77	0.288303	1.2212	0.000197353	0.0469804	up	cell surface;poly(A) RNA binding;protein binding;focal adhesion;cytoskeleton;actin binding;cytoplasm;cell-substrate junction assembly;fibroblast migration;cell-substrate junction;intracellular signal transduction;intracellular;
MAN2A1	mannosidase alpha class 2A member 1	Chr5:109689366-109869625	ENSMUSG00000024085	Chr17:64600736-64755110	1313.85	0.418969	1.33697	0.00020076	0.0471785	up	mannosyl-oligosaccharide 1,3-1,6-alpha-mannosidase activity;post-translational protein modification;protein deglycosylation;cellular protein metabolic process;extracellular exosome;mannosidase activity;protein N-linked glycosylation via asparagine;N-glycan processing;mannose metabolic process;alpha-mannosidase activity;carbohydrate binding;Golgi membrane;catalytic activity;hydrolase activity, hyd…	N-Glycan biosynthesis;Metabolic pathways;
PIEZO1	piezo type mechanosensitive ion channel component 1	Chr16:88715343-88785211	ENSMUSG00000014444	Chr8:122481698-122551329	1263.87	0.442527	1.35898	0.000212504	0.048265	up	mechanically-gated ion channel activity;ion transmembrane transport;integral component of membrane;lamellipodium membrane;positive regulation of integrin activation;endoplasmic reticulum-Golgi intermediate compartment membrane;positive regulation of cell-cell adhesion mediated by integrin;cation transport;endoplasmic reticulum;endoplasmic reticulum membrane;cation channel activity;plasma membrane;
RPS16	ribosomal protein S16	Chr19:39433207-39435948	ENSMUSG00000037563	Chr7:28350652-28353155	8560.72	-0.146211	-1.10666	0.000213282	0.048265	down	ribosome;translation;structural constituent of ribosome;ribosomal small subunit biogenesis;viral transcription;maturation of SSU-rRNA from tricistronic rRNA transcript (SSU-rRNA, 5.8S rRNA, LSU-rRNA);viral life cycle;viral process;gene expression;cellular protein metabolic process;extracellular exosome;translational initiation;cytosolic small ribosomal subunit;poly(A) RNA binding;protein binding;…	Ribosome;
SNRPC	small nuclear ribonucleoprotein polypeptide C	Chr6:34757406-34773794	ENSMUSG00000024217	Chr17:27839974-27851968	2212.42	-0.186003	-1.13761	0.000223466	0.0499528	down	pre-mRNA 5'-splice site binding;prespliceosome;single-stranded RNA binding;Cajal body;protein homodimerization activity;poly(A) RNA binding;protein binding;U2-type prespliceosome;U1 snRNP;mRNA binding;mRNA 5'-splice site recognition;spliceosomal snRNP assembly;commitment complex;mRNA splicing, via spliceosome;nucleoplasm;nucleic acid binding;zinc ion binding;nucleus;U1 snRNA binding;	Spliceosome;

## Sheet: Table S4
Supplementary Table 4. DAVID analysis for DEGs (Cyfip2-/-).
Category	Term	Count	%	PValue	Genes	List Total	Pop Hits	Pop Total	Fold Enrichment	Bonferroni	Benjamini	FDR
GOTERM_BP_DIRECT	GO:0030198~extracellular matrix organization	15	21.1268	1.23664e-14	COL4A2, COL4A1, ICAM2, ITGB4, NID1, POSTN, NID2, VWF, BGN, LAMC3, FBLN5, PECAM1, COL1A2, COL6A1, LAMC1	64	196	16792	20.0797	6.93812e-12	6.93812e-12	1.80411e-11
GOTERM_BP_DIRECT	GO:0007155~cell adhesion	13	18.3099	1.13634e-07	VWF, CYP1B1, LAMC3, ICAM2, PECAM1, ITGB4, COL6A1, POSTN, NID2, LAMC1, ADAM12, ENG, CXCL12	64	459	16792	7.4311	6.39738e-05	3.19874e-05	0.000166366
GOTERM_BP_DIRECT	GO:0071711~basement membrane organization	3	4.22535	0.000382293	COL4A1, NID1, NID2	64	8	16792	98.3906	0.193678	0.0692433	0.558241
GOTERM_BP_DIRECT	GO:0001525~angiogenesis	6	8.4507	0.0014847	PTPRB, FGFR1, COL4A2, CYP1B1, PECAM1, HIF3A	64	223	16792	7.05942	0.566779	0.188708	2.15181
GOTERM_BP_DIRECT	GO:0001501~skeletal system development	5	7.04225	0.00174018	FGFR1, COL1A2, POSTN, FOXC1, ALX4	64	137	16792	9.57573	0.624905	0.178083	2.51771
GOTERM_BP_DIRECT	GO:0030574~collagen catabolic process	4	5.6338	0.00178147	COL4A2, COL4A1, COL1A2, COL6A1	64	64	16792	16.3984	0.633538	0.154063	2.57672
GOTERM_BP_DIRECT	GO:0001666~response to hypoxia	5	7.04225	0.00395772	BECN1, POSTN, PDLIM1, CXCL12, ENG	64	172	16792	7.62718	0.892752	0.273085	5.64049
GOTERM_BP_DIRECT	GO:0007160~cell-matrix adhesion	4	5.6338	0.00468792	FBLN5, ITGB4, NID1, NID2	64	90	16792	11.6611	0.929031	0.281571	6.64821
GOTERM_BP_DIRECT	GO:0043542~endothelial cell migration	3	4.22535	0.00526914	CYP1B1, PECAM1, ADGRA2	64	29	16792	27.1422	0.94892	0.281425	7.44315
GOTERM_BP_DIRECT	GO:0030199~collagen fibril organization	3	4.22535	0.00938831	CYP1B1, COL1A2, FOXC1	64	39	16792	20.1827	0.995061	0.412018	12.8988
GOTERM_MF_DIRECT	GO:0005201~extracellular matrix structural constituent	5	7.04225	0.000135738	COL4A2, BGN, COL4A1, COL1A2, LAMC1	67	67	16881	18.8026	0.0212197	0.0212197	0.163427
GOTERM_MF_DIRECT	GO:0048407~platelet-derived growth factor binding	3	4.22535	0.000809408	COL4A1, COL1A2, COL6A1	67	11	16881	68.7151	0.120092	0.061966	0.970901
GOTERM_MF_DIRECT	GO:0044822~poly(A) RNA binding	11	15.493	0.0118424	FASTKD2, TNS1, RPS16, ZC3HAV1, MRPS23, MRPS11, RPS12, UBC, SNTB2, SNRPC, RBMS1	67	1129	16881	2.45483	0.847755	0.466033	13.3714
GOTERM_MF_DIRECT	GO:0005518~collagen binding	3	4.22535	0.0230361	VWF, NID1, NID2	67	60	16881	12.5978	0.974835	0.601709	24.4826
GOTERM_MF_DIRECT	GO:0042803~protein homodimerization activity	8	11.2676	0.0234827	FGFR1, VWF, FBLN5, HEYL, SNRPC, MECOM, ENG, TBX18	67	730	16881	2.76115	0.976588	0.52806	24.8975
GOTERM_MF_DIRECT	GO:0001228~transcriptional activator activity, RNA polymerase II transcription regulatory region sequence-specific binding	3	4.22535	0.053284	ELF5, FOXC1, ALX4	67	95	16881	7.95648	0.999825	0.763525	48.3021
GOTERM_MF_DIRECT	GO:0003735~structural constituent of ribosome	4	5.6338	0.0561442	RPS16, MRPS23, MRPS11, RPS12	67	222	16881	4.53973	0.999892	0.728616	50.1529
GOTERM_MF_DIRECT	GO:0002020~protease binding	3	4.22535	0.0593813	SERPINB9, VWF, UBC	67	101	16881	7.48382	0.999937	0.701518	52.1742
GOTERM_MF_DIRECT	GO:0005509~calcium ion binding	7	9.85915	0.0608552	PCDHGB1, CAPN11, CD93, FBLN5, NID1, NID2, EHD2	67	717	16881	2.45981	0.999951	0.667873	53.0694
GOTERM_MF_DIRECT	GO:0005178~integrin binding	3	4.22535	0.063574	VWF, FBLN5, ICAM2	67	105	16881	7.19872	0.999969	0.645774	54.6804
GOTERM_CC_DIRECT	GO:0031012~extracellular matrix	14	19.7183	7.21291e-11	COL4A2, COL4A1, NID1, POSTN, NID2, VWF, BGN, RPS16, CD93, FBLN5, COL1A2, COL6A1, LAMC1, CLEC14A	70	296	18224	12.3135	8.79975e-09	8.79975e-09	8.3047e-08
GOTERM_CC_DIRECT	GO:0070062~extracellular exosome	24	33.8028	0.000169405	CPNE8, COL4A2, ICAM2, ITGB4, RASSF9, NID1, NID2, CXCL12, MAN2A1, SERPINB9, VWF, BGN, RPS16, FBLN5, PECAM1, COL1A2, CYFIP2, UBC, SNTB2, COL6A1, SEMA3B, LAMC1, EHD2, CLEC14A	70	2811	18224	2.22278	0.020457	0.0102813	0.194873
GOTERM_CC_DIRECT	GO:0005604~basement membrane	5	7.04225	0.000228311	COL4A1, LAMC3, NID1, NID2, LAMC1	70	79	18224	16.4774	0.0274727	0.00924275	0.262555
GOTERM_CC_DIRECT	GO:0005576~extracellular region	16	22.5352	0.00085348	FGFR1, COL4A2, COL4A1, NID1, NID2, CXCL12, C1QTNF7, VWF, BGN, LAMC3, FBLN5, COL1A2, ITIH5, COL6A1, LAMC1, ADAM12	70	1610	18224	2.58726	0.098927	0.0257061	0.978271
GOTERM_CC_DIRECT	GO:0005578~proteinaceous extracellular matrix	6	8.4507	0.00346049	VWF, BGN, LAMC3, FBLN5, COL1A2, POSTN	70	268	18224	5.82857	0.344864	0.0811041	3.91261
GOTERM_CC_DIRECT	GO:0043235~receptor complex	4	5.6338	0.0123967	PTPRB, FGFR1, ITGB4, ENG	70	127	18224	8.19978	0.781692	0.22403	13.3786
GOTERM_CC_DIRECT	GO:0009986~cell surface	7	9.85915	0.0166111	BGN, TNS1, CD93, ADGRF5, ITGB4, ADGRA2, ENG	70	542	18224	3.36236	0.870435	0.253186	17.5403
GOTERM_CC_DIRECT	GO:0005587~collagen type IV trimer	2	2.8169	0.0225064	COL4A2, COL4A1	70	6	18224	86.781	0.937785	0.293296	23.056
GOTERM_CC_DIRECT	GO:0005615~extracellular space	11	15.493	0.0296374	MAN2A1, SERPINB9, FBLN5, PECAM1, COL1A2, UBC, POSTN, SEMA3B, LAMC1, CXCL12, ENG	70	1347	18224	2.12604	0.974534	0.334905	29.2766
GOTERM_CC_DIRECT	GO:0005788~endoplasmic reticulum lumen	4	5.6338	0.0363336	COL4A2, COL4A1, COL1A2, COL6A1	70	192	18224	5.42381	0.989059	0.363342	34.6963
KEGG_PATHWAY	hsa04512:ECM-receptor interaction	8	11.2676	6.32462e-08	VWF, COL4A2, COL4A1, LAMC3, COL1A2, ITGB4, COL6A1, LAMC1	31	87	6910	20.4968	3.79477e-06	3.79477e-06	6.33832e-05
KEGG_PATHWAY	hsa04510:Focal adhesion	8	11.2676	2.14627e-05	VWF, COL4A2, COL4A1, LAMC3, COL1A2, ITGB4, COL6A1, LAMC1	31	206	6910	8.65644	0.00128695	0.000643681	0.0215071
KEGG_PATHWAY	hsa04151:PI3K-Akt signaling pathway	9	12.6761	7.91669e-05	FGFR1, VWF, COL4A2, COL4A1, LAMC3, COL1A2, ITGB4, COL6A1, LAMC1	31	345	6910	5.81487	0.00473893	0.00158215	0.07931
KEGG_PATHWAY	hsa05146:Amoebiasis	6	8.4507	8.11451e-05	SERPINB9, COL4A2, COL4A1, LAMC3, COL1A2, LAMC1	31	106	6910	12.6172	0.00485707	0.00121649	0.0812911
KEGG_PATHWAY	hsa05222:Small cell lung cancer	4	5.6338	0.00573932	COL4A2, COL4A1, LAMC3, LAMC1	31	85	6910	10.4896	0.292028	0.0667389	5.60511
KEGG_PATHWAY	hsa05200:Pathways in cancer	7	9.85915	0.00602916	FGFR1, COL4A2, COL4A1, LAMC3, LAMC1, MECOM, CXCL12	31	393	6910	3.97029	0.304306	0.0586819	5.88052
KEGG_PATHWAY	hsa04974:Protein digestion and absorption	4	5.6338	0.00632103	COL4A2, COL4A1, COL1A2, COL6A1	31	88	6910	10.132	0.316457	0.0529015	6.15712

## Sheet: Table S5
Supplementary Table 5. GSEA (Gene-Set Enrichment analysis) (Cyfip2-/-).
NAME	SIZE	ES	NES	NOM p-val	FDR q-val	FWER p-val	RANK AT MAX	LEADING EDGE
Up-regulated
HALLMARK_EPITHELIAL_MESENCHYMAL_TRANSITION	190	0.343838	5.59509	0	0	0	2246	tags=48%, list=14%, signal=56%
HALLMARK_INTERFERON_GAMMA_RESPONSE	182	0.31525	4.99162	0	0	0	6002	tags=70%, list=39%, signal=112%
HALLMARK_INFLAMMATORY_RESPONSE	179	0.270713	4.19503	0	0	0	7388	tags=74%, list=48%, signal=140%
HALLMARK_INTERFERON_ALPHA_RESPONSE	88	0.343008	3.79524	0	0	0	2999	tags=53%, list=19%, signal=66%
HALLMARK_COAGULATION	113	0.28822	3.56929	0	0	0	5730	tags=65%, list=37%, signal=103%
HALLMARK_KRAS_SIGNALING_UP	186	0.225986	3.48534	0	0	0	4634	tags=52%, list=30%, signal=73%
HALLMARK_APICAL_JUNCTION	186	0.21215	3.38649	0	0	0	7019	tags=66%, list=45%, signal=119%
HALLMARK_HYPOXIA	185	0.215936	3.38012	0	0	0	5504	tags=57%, list=35%, signal=87%
HALLMARK_COMPLEMENT	173	0.203407	3.09591	0	0	0	6216	tags=60%, list=40%, signal=99%
HALLMARK_MYOGENESIS	189	0.184286	2.98165	0	0	0	5064	tags=51%, list=33%, signal=74%
HALLMARK_UV_RESPONSE_DN	140	0.217109	2.97559	0	0	0	3760	tags=46%, list=24%, signal=60%
HALLMARK_TNFA_SIGNALING_VIA_NFKB	188	0.184278	2.95805	0	0	0	6594	tags=61%, list=42%, signal=104%
HALLMARK_ALLOGRAFT_REJECTION	172	0.18238	2.79315	0	9.34066e-05	0.001	7768	tags=68%, list=50%, signal=134%
HALLMARK_IL6_JAK_STAT3_SIGNALING	76	0.268718	2.71922	0	8.67347e-05	0.001	4023	tags=53%, list=26%, signal=71%
HALLMARK_IL2_STAT5_SIGNALING	191	0.167465	2.68823	0	8.09524e-05	0.001	6786	tags=60%, list=44%, signal=106%
HALLMARK_ANGIOGENESIS	33	0.382898	2.58789	0	7.58929e-05	0.001	3951	tags=64%, list=25%, signal=85%
HALLMARK_APOPTOSIS	154	0.173157	2.51367	0	7.14286e-05	0.001	4399	tags=45%, list=28%, signal=63%
HALLMARK_APICAL_SURFACE	40	0.310795	2.30773	0	0.000985569	0.013	6449	tags=73%, list=41%, signal=124%
HALLMARK_XENOBIOTIC_METABOLISM	178	0.138373	2.14643	0.00601202	0.00317642	0.043	4247	tags=41%, list=27%, signal=56%
HALLMARK_HEME_METABOLISM	188	0.132598	2.10617	0	0.00401397	0.057	3750	tags=37%, list=24%, signal=48%
HALLMARK_ESTROGEN_RESPONSE_EARLY	190	0.133077	2.08143	0	0.00452546	0.067	5727	tags=50%, list=37%, signal=78%
HALLMARK_HEDGEHOG_SIGNALING	35	0.245473	1.7388	0.0200803	0.032584	0.4	8182	tags=77%, list=53%, signal=163%
HALLMARK_GLYCOLYSIS	190	0.109341	1.73761	0.00775194	0.0311673	0.4	7891	tags=62%, list=51%, signal=124%
HALLMARK_KRAS_SIGNALING_DN	154	0.117622	1.69673	0.0116054	0.036811	0.479	8584	tags=67%, list=55%, signal=148%
HALLMARK_ESTROGEN_RESPONSE_LATE	184	0.108651	1.67324	0.037037	0.0398435	0.517	5679	tags=47%, list=37%, signal=74%
Down-regulated
HALLMARK_MYC_TARGETS_V1	197	-0.386142	-6.26772	0	0	0	4174	tags=65%, list=27%, signal=88%
HALLMARK_OXIDATIVE_PHOSPHORYLATION	180	-0.339579	-5.28333	0	0	0	4714	tags=64%, list=30%, signal=91%
HALLMARK_MYC_TARGETS_V2	58	-0.419314	-3.80817	0	0	0	3959	tags=67%, list=25%, signal=90%
HALLMARK_DNA_REPAIR	139	-0.250189	-3.40007	0	0	0	5316	tags=59%, list=34%, signal=89%
HALLMARK_E2F_TARGETS	196	-0.202556	-3.31911	0	0	0	10135	tags=85%, list=65%, signal=242%
HALLMARK_UNFOLDED_PROTEIN_RESPONSE	109	-0.210191	-2.55529	0	0.000475709	0.004	4742	tags=51%, list=31%, signal=73%
HALLMARK_MTORC1_SIGNALING	196	-0.13694	-2.17637	0	0.00305436	0.033	6067	tags=53%, list=39%, signal=85%
Up-regulated
KEGG_ECM_RECEPTOR_INTERACTION	82	0.403299	4.36189	0	0	0	1535	tags=50%, list=10%, signal=55%
KEGG_FOCAL_ADHESION	190	0.270779	4.31388	0	0	0	2795	tags=45%, list=18%, signal=54%
KEGG_CYTOKINE_CYTOKINE_RECEPTOR_INTERACTION	178	0.218903	3.37798	0	0	0	3359	tags=43%, list=22%, signal=55%
KEGG_HEMATOPOIETIC_CELL_LINEAGE	65	0.336542	3.14649	0	0	0	2920	tags=52%, list=19%, signal=64%
KEGG_COMPLEMENT_AND_COAGULATION_CASCADES	52	0.357173	3.02442	0	0	0	5824	tags=73%, list=37%, signal=116%
KEGG_PATHWAYS_IN_CANCER	311	0.144676	2.91097	0	0	0	4492	tags=43%, list=29%, signal=59%
KEGG_NEUROACTIVE_LIGAND_RECEPTOR_INTERACTION	226	0.162502	2.8764	0	0	0	8307	tags=69%, list=53%, signal=147%
KEGG_ARRHYTHMOGENIC_RIGHT_VENTRICULAR_CARDIOMYOPATHY_ARVC	73	0.281927	2.82636	0	0	0	2025	tags=41%, list=13%, signal=47%
KEGG_HYPERTROPHIC_CARDIOMYOPATHY_HCM	80	0.269487	2.79155	0	0	0	2049	tags=40%, list=13%, signal=46%
KEGG_CELL_ADHESION_MOLECULES_CAMS	104	0.231154	2.75648	0	0	0	4052	tags=49%, list=26%, signal=66%
KEGG_DILATED_CARDIOMYOPATHY	87	0.248802	2.74541	0	0	0	2049	tags=38%, list=13%, signal=43%
KEGG_LEISHMANIA_INFECTION	59	0.298386	2.73692	0	0.000243673	0.002	7760	tags=80%, list=50%, signal=158%
KEGG_JAK_STAT_SIGNALING_PATHWAY	110	0.222026	2.70143	0.00200401	0.000224929	0.002	8865	tags=79%, list=57%, signal=183%
KEGG_VASCULAR_SMOOTH_MUSCLE_CONTRACTION	98	0.213998	2.4884	0	0.00132861	0.013	8747	tags=78%, list=56%, signal=176%
KEGG_CHEMOKINE_SIGNALING_PATHWAY	153	0.169595	2.42792	0	0.00256755	0.027	9071	tags=75%, list=58%, signal=179%
KEGG_CALCIUM_SIGNALING_PATHWAY	167	0.153984	2.29445	0	0.00591192	0.065	8241	tags=68%, list=53%, signal=144%
KEGG_LEUKOCYTE_TRANSENDOTHELIAL_MIGRATION	104	0.189448	2.25221	0	0.00737875	0.086	3052	tags=38%, list=20%, signal=48%
KEGG_SMALL_CELL_LUNG_CANCER	83	0.217888	2.25186	0.00199601	0.00696882	0.086	1312	tags=30%, list=8%, signal=33%
KEGG_REGULATION_OF_ACTIN_CYTOSKELETON	201	0.12896	2.12754	0	0.0154273	0.182	2892	tags=31%, list=19%, signal=38%
KEGG_ADHERENS_JUNCTION	68	0.214958	2.10807	0.00982318	0.0163352	0.2	7415	tags=69%, list=48%, signal=132%
KEGG_GLYCOLYSIS_GLUCONEOGENESIS	50	0.251627	2.09376	0.00206612	0.0170188	0.216	5426	tags=60%, list=35%, signal=92%
KEGG_MELANOGENESIS	95	0.179595	2.08321	0.0060241	0.0170598	0.224	6550	tags=60%, list=42%, signal=103%
KEGG_B_CELL_RECEPTOR_SIGNALING_PATHWAY	74	0.204775	2.05718	0.00392927	0.0195097	0.26	8173	tags=73%, list=53%, signal=153%
KEGG_STARCH_AND_SUCROSE_METABOLISM	30	0.310345	2.01077	0.00419287	0.0251651	0.326	3474	tags=53%, list=22%, signal=69%
KEGG_APOPTOSIS	80	0.18717	2.00884	0.00769231	0.0243285	0.329	7013	tags=64%, list=45%, signal=116%
KEGG_NATURAL_KILLER_CELL_MEDIATED_CYTOTOXICITY	86	0.184393	1.99831	0.0105485	0.0244911	0.341	8173	tags=71%, list=53%, signal=149%
KEGG_GLYCOSAMINOGLYCAN_DEGRADATION	19	0.371771	1.98457	0.00413223	0.0253971	0.362	9770	tags=100%, list=63%, signal=269%
KEGG_ALDOSTERONE_REGULATED_SODIUM_REABSORPTION	38	0.270124	1.97664	0.00934579	0.025972	0.376	6854	tags=71%, list=44%, signal=127%
KEGG_BETA_ALANINE_METABOLISM	22	0.344125	1.93929	0.0162272	0.0315236	0.449	5255	tags=68%, list=34%, signal=103%
KEGG_TOLL_LIKE_RECEPTOR_SIGNALING_PATHWAY	83	0.180261	1.92814	0.0041841	0.0326229	0.475	6575	tags=60%, list=42%, signal=104%
KEGG_PPAR_SIGNALING_PATHWAY	54	0.217528	1.88807	0.00970874	0.0388561	0.555	5840	tags=59%, list=38%, signal=95%
Down-regulated
KEGG_RIBOSOME	82	-0.509843	-5.44955	0	0	0	5955	tags=89%, list=38%, signal=144%
KEGG_SPLICEOSOME	119	-0.379891	-4.80973	0	0	0	6027	tags=76%, list=39%, signal=124%
KEGG_OXIDATIVE_PHOSPHORYLATION	107	-0.35244	-4.31622	0	0	0	4293	tags=63%, list=28%, signal=86%
KEGG_PARKINSONS_DISEASE	108	-0.328882	-4.0633	0	0	0	5862	tags=70%, list=38%, signal=112%
KEGG_HUNTINGTONS_DISEASE	157	-0.261918	-3.83116	0	0	0	2109	tags=39%, list=14%, signal=45%
KEGG_PROTEASOME	42	-0.426541	-3.22294	0	0	0	4121	tags=69%, list=27%, signal=94%
KEGG_RNA_POLYMERASE	27	-0.507781	-3.15437	0	0	0	4211	tags=78%, list=27%, signal=106%
KEGG_ALZHEIMERS_DISEASE	143	-0.195286	-2.71966	0	6.18132e-05	0.001	2102	tags=33%, list=14%, signal=38%
KEGG_PYRIMIDINE_METABOLISM	93	-0.215665	-2.44067	0	0.00135389	0.022	7699	tags=71%, list=50%, signal=140%
KEGG_GLYOXYLATE_AND_DICARBOXYLATE_METABOLISM	15	-0.470106	-2.25891	0	0.0049053	0.085	3063	tags=67%, list=20%, signal=83%
KEGG_RNA_DEGRADATION	54	-0.253632	-2.15173	0	0.00893242	0.167	4995	tags=57%, list=32%, signal=84%
KEGG_CITRATE_CYCLE_TCA_CYCLE	28	-0.325729	-2.07708	0.00601202	0.0122648	0.242	5494	tags=68%, list=35%, signal=105%
KEGG_BASAL_TRANSCRIPTION_FACTORS	32	-0.290974	-2.01317	0.00591716	0.0163193	0.333	3259	tags=50%, list=21%, signal=63%
KEGG_DNA_REPLICATION	35	-0.276214	-1.95945	0.00413223	0.0206317	0.424	5487	tags=63%, list=35%, signal=97%
KEGG_NUCLEOTIDE_EXCISION_REPAIR	43	-0.23528	-1.80426	0.0141988	0.0459269	0.736	5029	tags=56%, list=32%, signal=82%
